# Supplementary material for: Temporal biomass dynamics of an Arctic plankton bloom in response to increasing levels of atmospheric carbon dioxide
Source: Copernicus journal article supplement (doi:10.5194/bg-10-161-2013), 2013-01-11
Supplement: Supplementary file 1 [file CHEMTAX_pigment_calculation_Svalbard_2010.xls]

## Sheet: Notes
Time and Date binning	Sort parameter text is TIME
	FORMAT for parameter is DDMMYYYY HH.MM
	If both time and date are present a combined timedate is used for sorting (see above format)
Optimisation	ALL or PIGMENT (e.g. CHL_A)
Normalising	F1 values are normalised with respect to row sum (ROW) or a particular pigment (that has an entry for all species) e.g. CHL_A

## Sheet: Configuration
Data Configuration
Convergence Runs	1
First Sort Parameter	Meso
Second Sort Parameter
Update Ratio Matrix?
Optimise ON	all
Normalise F0 On	row
Bin	Start (>=)	End (<=)	Start (>=)	End (<=)	Ratio Matrix	RLM
1	1	11			Testrun1	A
Run Configuration
Diary Filename			VERBOSITY	WEIGHTING
Verbosity	2
Iteration Limit	100
Epsilon Limit	0.0001
Initial Step Size	10
Step Ratio	1.3
Cutoff Step	1000
Elements Varied	5
Subiterations	1
Weighting	3
Weight Bound	30
Comments	Testrun data - optimise on chl_a.
Verbosity	Weighting
Minimum	None
Low	Relative
Normal	Bounded Relative
Verbose
Maximum
Update
YES
NO

## Sheet: Data
Data
Date	Time	Mesocosm	c3	c12	perid	but	fucox	neox	prasinox	violax	diad	allox	diato	zeax	chl_b	chl_a
2010-06-07	0	1	0.00346709	0.0277059	0	0.00630054	0.0450425	0.00588365	0.00900679	0.00899811	0.0202868	0.0042811	0.00491449	0.017053	0.0475644	0.182565
2010-06-08	1	1	0.00229418	0.0271473	0.00503668	0.00624234	0.0754486	0.00593501	0.0195105	0.00889649	0.0500776	0.00515452	0.010754	0.0182588	0.0507646	0.314107
2010-06-09	2	1	0.0042564	0.050901	0.00660587	0.00836063	0.110208	0.00806363	0.0153527	0.0135422	0.0604085	0.00570545	0.0094277	0.0200372	0.0899591	0.392874
2010-06-11	4	1	0	0.059696	0.00323241	0.00835287	0.211099	0.00656846	0.0242342	0.0103077	0.107669	0.00683418	0.0291039	0.0156519	0.094654	0.6297
2010-06-13	6	1	0.0114119	0.126832	0.00404933	0.0123373	0.264502	0.00585226	0.0269881	0.0144664	0.110514	0.00699274	0.0163591	0.00337208	0.132635	0.70826
2010-06-15	8	1	0.0324099	0.161356	0.00625324	0.0123101	0.350769	0.031584	0.0429174	0.016146	0.122057	0.00975543	0.0244734	0.0196335	0.220766	0.930065
2010-06-17	10	1	0.0344569	0.138954	0.00380249	0.0152625	0.239239	0.0216228	0.0445433	0.0191696	0.0749403	0.00435367	0.0153741	0.0143986	0.207964	0.633944
2010-06-19	12	1	0.0136729	0.0629649	0.00731112	0.0132955	0.144321	0.0194315	0.0399092	0.0142612	0.03979	0.00329212	0.0081665	0.0188261	0.138807	0.366121
2010-06-20	13	1	0.0108783	0.0527485	0.00899589	0.0124645	0.191671	0.0154828	0.0479063	0.0233149	0.0652987	0.0033998	0.011521	0.0326337	0.203204	0.59714
2010-06-21	14	1	0.00991439	0.0610141	0.00988608	0.0180719	0.165878	0.0282354	0.0612762	0.0260596	0.0579595	0.00424545	0.0206683	0.0388312	0.221247	0.573129
2010-06-22	15	1	0.00964686	0.058463	0.00220039	0.021308	0.124502	0.0229213	0.0560963	0.032144	0.0446205	0.00507103	0.012113	0.0287892	0.208156	0.47312
2010-06-23	16	1	0.00978062	0.0723713	0.00783614	0.0281983	0.129499	0.0314769	0.0764415	0.0381895	0.0415117	0.00287808	0.00734342	0.0270217	0.304637	0.551934
2010-06-24	17	1	0.0133608	0.0956324	0.0129516	0.0335201	0.121124	0.0378319	0.0862971	0.0431674	0.0448655	0.00292968	0.0146535	0.0431823	0.443301	0.70166
2010-06-25	18	1	0.00647976	0.0831122	0.0128387	0.0478468	0.114466	0.0474375	0.11675	0.0500208	0.0368757	0.0015365	0.0196455	0.0605447	0.550474	0.825791
2010-06-26	19	1	0.0045559	0.0738271	0.0200166	0.0501022	0.131765	0.0587871	0.137366	0.0667953	0.0507837	0.00789751	0.0105927	0.0463458	0.654364	0.943787
2010-06-27	20	1	0.00433164	0.063815	0.0155469	0.0322745	0.093774	0.0348157	0.0862398	0.0394289	0.0418574	0.00607148	0.0160432	0.0500102	0.371015	0.533719
2010-06-28	21	1	0.0034543	0.0445362	0.025013	0.0210183	0.0987455	0.0251279	0.0658793	0.0207851	0.0501848	0.00233629	0.0173357	0.0575558	0.295278	0.557966
2010-06-29	22	1	0	0.0595911	0.0192957	0.0141447	0.116804	0.0114135	0.0324163	0.0156906	0.0572545	0.00392439	0.0120491	0.0317922	0.178746	0.436989
2010-06-30	23	1	0.003592	0.0681106	0.026179	0.0126838	0.130725	0.0100256	0.0228549	0.0129848	0.0575049	0.00393872	0.0125855	0.0229013	0.118801	0.360643
2010-07-01	24	1	0.000826199	0.121393	0.0826306	0.0133667	0.256242	0.0099556	0.0357817	0.0190426	0.100843	0.00913016	0.0113431	0.0281615	0.174582	0.804406
2010-07-02	25	1	0	0.18529	0.210203	0.0161683	0.419292	0.0160489	0.0403389	0.0199445	0.15139	0.0121573	0.0136112	0.0304891	0.203654	1.27438
2010-07-03	26	1	0.00472507	0.222271	0.0994375	0.0141985	0.365988	0.0120374	0.0355067	0.0175026	0.136273	0.0129341	0.0138169	0.0269907	0.175351	0.984988
2010-07-04	27	1	0.00552767	0.272704	0.100334	0.0150634	0.52366	0.0178811	0.0393649	0.0211716	0.159924	0.0144105	0.0126884	0.0251444	0.163741	1.27521
2010-07-05	28	1	0.00540177	0.279424	0.178689	0.0149433	0.6857	0.0186146	0.0453087	0.0244766	0.222057	0.017214	0.0289373	0.0236218	0.22588	1.78179
2010-07-06	29	1	0.00282481	0.252304	0.110208	0.0125638	0.574343	0.0163745	0.0374167	0.0169156	0.17261	0.0110164	0.0171745	0.0305172	0.204161	1.35875
2010-07-07	30	1	0.00655451	0.238229	0.122256	0.0110161	0.490166	0.0131605	0.0355984	0.0137435	0.165475	0.0121	0.0261356	0.0274748	0.140521	1.07248
2010-06-07	0	2	0.00502359	0.0344529	0	0.00250237	0.0522899	0.0010586	0.00852332	0.0083117	0.019955	0.0023112	0.0035621	0.016177	0.0657637	0.179475
2010-06-08	1	2	0.0013979	0.0358675	0.00273873	0.00690576	0.0749258	0.00745015	0.0148406	0.011832	0.035528	0.00505509	0.00512035	0.0135068	0.0891854	0.270721
2010-06-09	2	2	0.0046363	0.0289497	0	0.00915595	0.0917443	0.00398901	0.0175086	0.0116997	0.0500342	0.00509271	0.00732484	0.0121875	0.0826266	0.302908
2010-06-11	4	2	0.00137577	0.067635	0.0136702	0.00601732	0.22502	0.00873417	0.0236218	0.0121867	0.0958217	0.00532921	0.0307482	0.0113854	0.116177	0.680871
2010-06-13	6	2	0.0135585	0.113213	0.00691148	0.00555565	0.233738	0.00614045	0.022311	0.0135173	0.0925014	0.00752217	0.0101834	0.0103748	0.146544	0.639192
2010-06-15	8	2	0.0402514	0.150006	0.00430792	0.00900077	0.191569	0.0088483	0.0245565	0.0107333	0.0607454	0.00576458	0.00908895	0.0082455	0.137541	0.488452
2010-06-17	10	2	0.0406571	0.105743	0.00547159	0.0109251	0.144392	0.00692513	0.0275611	0.0109826	0.0414616	0.00323569	0.0119918	0.00884445	0.155916	0.408672
2010-06-19	12	2	0.0126475	0.0424091	0	0.0132529	0.100071	0.0191632	0.0358373	0.0151624	0.0269886	0.00115829	0.00530015	0.0184435	0.136838	0.285713
2010-06-20	13	2	0.00345823	0.0305234	0	0.0106106	0.0955907	0.0170472	0.0325462	0.0154656	0.0299475	0.00279208	0.0076992	0.0191384	0.129211	0.337555
2010-06-21	14	2	0.0109491	0.0510512	0.00646952	0.0182954	0.135013	0.0193968	0.0500455	0.0284258	0.0509171	0.00571889	0.0141004	0.0288454	0.239385	0.558952
2010-06-22	15	2	0.00987505	0.0485492	0	0.0144095	0.0662008	0.019686	0.0424208	0.0266138	0.0267325	0.00135877	0.00433879	0.0158539	0.141628	0.272446
2010-06-23	16	2	0.00570864	0.0590465	0.0121366	0.0273416	0.112645	0.037981	0.0835658	0.0536346	0.0426741	0.00362913	0.011849	0.0339368	0.385964	0.631039
2010-06-24	17	2	0.0081479	0.0729323	0.00796779	0.0222847	0.0605711	0.0255206	0.054469	0.0196255	0.0257444	0	0.00554787	0.0262984	0.228656	0.346371
2010-06-25	18	2	0.00861608	0.0686798	0.00761046	0.0348402	0.0999793	0.0428477	0.104744	0.0517612	0.0343821	0.00399319	0.0126272	0.04965	0.494205	0.747679
2010-06-26	19	2	0.0102921	0.0649268	0.0141364	0.0204514	0.0581681	0.029325	0.061643	0.0323546	0.0249631	0.00139317	0.00526714	0.0205428	0.310208	0.399715
2010-06-27	20	2	0.00511457	0.0597549	0.0206059	0.0249621	0.102541	0.0243366	0.0654553	0.0279084	0.0492619	0.0050309	0.0152761	0.0374661	0.291114	0.47763
2010-06-28	21	2	0.00523653	0.0448167	0.0160171	0.0177781	0.0873457	0.0175007	0.0459123	0.0169197	0.04094	0.00358326	0.0103731	0.0339678	0.17205	0.367346
2010-06-29	22	2	0.00177043	0.0848239	0.0171079	0.0111113	0.135071	0.0127131	0.0293871	0.0151036	0.0529587	0.00558989	0.0102424	0.0257129	0.14491	0.401876
2010-06-30	23	2	0.00333627	0.0568107	0.0223863	0.0105485	0.253476	0.0148923	0.0294902	0.0153674	0.0880296	0.0051943	0.0164379	0.0328223	0.109948	0.560489
2010-07-01	24	2	0.00433951	0.164773	0.0281662	0.00972911	0.358394	0.0104274	0.0258039	0.0147293	0.0792857	0.00728692	0.00787709	0.0304469	0.140709	0.781278
2010-07-02	25	2	0	0.365036	0.0817466	0.0181753	0.783949	0.0302138	0.048189	0.0239142	0.12879	0.0113145	0.0114515	0.0380403	0.246662	1.67207
2010-07-03	26	2	0.00358413	0.263419	0.0284421	0.0159489	0.673279	0.0175281	0.0361637	0.0212391	0.136143	0.0133269	0.0141226	0.0396108	0.188874	1.36061
2010-07-04	27	2	0.00616895	0.540939	0.0289937	0.0127542	0.738947	0.0134162	0.0350674	0.0189383	0.130695	0.00654734	0.00833848	0.024165	0.156107	1.33909
2010-07-05	28	2	0.00298612	0.266978	0.0355259	0.0182829	0.747142	0.0214756	0.0512755	0.0279718	0.140158	0.00694293	0.00901946	0.036498	0.239947	1.5096
2010-07-06	29	2	0.00464639	0.207663	0.0146943	0.0137515	0.617402	0.0211439	0.0433796	0.0268633	0.131765	0.00513697	0.0122576	0.0371819	0.198327	1.20396
2010-07-07	30	2	0.00679057	0.254562	0.0334509	0.0159738	0.424188	0.0124909	0.0387613	0.0125205	0.116657	0.00581349	0.022008	0.0458392	0.171412	0.916086
2010-06-07	0	3	0	0.0318347	0.00521887	0.00552461	0.0563874	0.0039776	0.0117536	0.00921669	0.027277	0.00351249	0.00420312	0.0216204	0.0531385	0.179771
2010-06-08	1	3	0.00163396	0.0455149	0.00270935	0.00796878	0.0907764	0.00641438	0.0116784	0.00962509	0.0431945	0.00606557	0.00459659	0.0146255	0.0653417	0.281344
2010-06-09	2	3	0.00208394	0.0503693	0.00293855	0.00785627	0.111224	0.004106	0.0153563	0.0107793	0.0565293	0.00483203	0.00760886	0.0122218	0.0869347	0.356888
2010-06-11	4	3	0.00559897	0.0932429	0.00396705	0.00295241	0.212222	0.00258515	0.0137913	0.0076924	0.0970543	0.00312281	0.0264486	0.00880487	0.0578509	0.589855
2010-06-13	6	3	0.0112127	0.152638	0.00787532	0.00453142	0.391893	0.00508185	0.0225725	0.0127542	0.148247	0.00699543	0.0219198	0.00551987	0.102655	0.865794
2010-06-15	8	3	0.0295772	0.165439	0.00826321	0.009928	0.374626	0.00745871	0.025219	0.0126967	0.150069	0.00555764	0.0217165	0.0104645	0.150782	0.87264
2010-06-17	10	3	0.0412731	0.13656	0.00584772	0.00704543	0.232032	0.00679102	0.0208786	0.0113603	0.0773903	0.00386992	0.0129794	0.00754892	0.110427	0.523463
2010-06-19	12	3	0.0114672	0.0378638	0.00460765	0.00815501	0.094884	0.0057153	0.0178954	0.00937583	0.0289741	0.000572426	0.00466694	0.0111558	0.0761733	0.211736
2010-06-20	13	3	0.00712105	0.0218627	0	0.00928217	0.0936014	0.0085799	0.0217815	0.0129234	0.0303504	0.00159097	0.00474182	0.0151306	0.0958626	0.245809
2010-06-21	14	3	0.0108311	0.0403676	0.0123936	0.0173891	0.125988	0.016055	0.0394374	0.0234458	0.0459571	0.00425405	0.0107372	0.027199	0.183904	0.469209
2010-06-22	15	3	0.0094108	0.0483342	0.00603696	0.0131225	0.0878421	0.0199964	0.0422298	0.0256321	0.0322642	0.00552396	0.007374	0.0194761	0.163441	0.313939
2010-06-23	16	3	0.00786856	0.0624064	0.0094786	0.0190071	0.0940438	0.0223187	0.0523719	0.03088	0.0337995	0.00111511	0.00795213	0.0198814	0.248031	0.417528
2010-06-24	17	3	0.00999701	0.084093	0.0125629	0.0217467	0.0688412	0.0226717	0.0564974	0.0316736	0.0282243	0.00192923	0.00924738	0.0254062	0.260204	0.400299
2010-06-25	18	3	0.00638927	0.0543578	0.00824989	0.0563676	0.10689	0.0530377	0.126204	0.0749596	0.0402839	0.00425118	0.0157208	0.0553042	0.639941	0.867717
2010-06-26	19	3	0.0150644	0.0973646	0.00859468	0.0384943	0.0702766	0.0450391	0.0884745	0.0565694	0.0305001	0.000796918	0.00741013	0.0276746	0.402713	0.554339
2010-06-27	20	3	0.00602339	0.0742058	0.0082687	0.0349395	0.06619	0.0370832	0.0918437	0.0489859	0.0319511	0.0015709	0.0113403	0.0453241	0.381537	0.494757
2010-06-28	21	3	0.00269498	0.0481909	0.017484	0.031513	0.065949	0.0370314	0.0918208	0.0440448	0.0328712	0.00208976	0.0106594	0.0524926	0.345619	0.510457
2010-06-29	22	3	0.00452442	0.0642675	0.0151896	0.0382419	0.123995	0.0369462	0.0965155	0.0555673	0.0479199	0.00500797	0.008458	0.051924	0.420738	0.649917
2010-06-30	23	3	0.00341889	0.0940027	0.0208128	0.0226033	0.134776	0.0224465	0.0674684	0.0351013	0.0568107	0.00265161	0.0124966	0.0397459	0.251313	0.521386
2010-07-01	24	3	0.00700302	0.147922	0.0378768	0.0334456	0.314288	0.0349648	0.0843489	0.0497938	0.087368	0.00651294	0.00976158	0.0459743	0.394104	1.03718
2010-07-02	25	3	0.00694794	0.319949	0.0916014	0.0389744	0.497839	0.0396154	0.0953084	0.0511722	0.112759	0.00431712	0.00979494	0.0494248	0.515437	1.51359
2010-07-03	26	3	0	0	0	0	0	0	0	0	0	0	0	0	0	0
2010-07-04	27	3	0.00619649	0.378185	0.0388234	0.0323034	0.616611	0.0382276	0.0845055	0.0431061	0.120503	0.00755639	0.00793823	0.0403059	0.448215	1.47204
2010-07-05	28	3	0	0.164421	0.0562635	0.0484096	0.777402	0.04391	0.106195	0.0492354	0.152133	0.00590808	0.0157708	0.0653153	0.503021	1.81628
2010-07-06	29	3	0.00446148	0.184197	0.0120614	0.0296674	0.437099	0.0295868	0.0716169	0.0387417	0.0892001	0.00260575	0.0103175	0.0409476	0.321855	1.00777
2010-07-07	30	3	0.0101072	0.130453	0.0211262	0.0156137	0.23518	0.017032	0.0520013	0.0209221	0.066276	0.000991847	0.00928907	0.037953	0.204123	0.576536
2010-06-07	0	4	0.0031757	0.0358215	0.00592412	0.00489999	0.0458452	0.00691372	0.0125021	0.00832896	0.0263531	0.00553077	0.00552164	0.0215333	0.0591346	0.223098
2010-06-08	1	4	0.00153437	0.0295639	0	0.00460901	0.0795292	0.00595499	0.0169428	0.0124551	0.036605	0.00255039	0.00237386	0.0206916	0.0586422	0.272635
2010-06-09	2	4	0.00469532	0.0315007	0	0.00216484	0.124993	0.0102807	0.0257275	0.0151375	0.0597118	0.00412792	0.00757238	0.0175411	0.106506	0.378444
2010-06-11	4	4	0.00375478	0.0807989	0.00656473	0.00822484	0.173061	0.0057524	0.0204202	0.0125414	0.0775766	0.00442623	0.0203615	0.00916636	0.0760327	0.53158
2010-06-13	6	4	0.0144068	0.110674	0.0090096	0.00650228	0.281003	0.0302657	0.0385627	0.0191831	0.124929	0.00437248	0.0165571	0.0106783	0.142517	0.753199
2010-06-15	8	4	0.0271281	0.120181	0.00691735	0.013893	0.332035	0.0161444	0.0388492	0.0122672	0.117254	0.00810265	0.0238428	0.0210715	0.187901	0.794361
2010-06-17	10	4	0.029994	0.0860276	0.00380249	0.0096991	0.202664	0.0175254	0.0321881	0.00884089	0.0461575	0.00536146	0.0166744	0.017206	0.144838	0.448917
2010-06-19	12	4	0.019021	0.0481235	0	0.00444219	0.0864967	0.00521882	0.0171004	0.00622563	0.0222672	0.00211502	0.00558678	0.00789721	0.0309476	0.148589
2010-06-20	13	4	0.0103118	0.0377079	0	0.00695232	0.113922	0.0089086	0.0207616	0.00916032	0.0388166	0.000796918	0.0121603	0.0208664	0.0957876	0.282279
2010-06-21	14	4	0.0101229	0.049016	0.0371182	0.0174387	0.142568	0.0181977	0.0464662	0.0238283	0.0474271	0.00366066	0.0178027	0.0267599	0.192907	0.515645
2010-06-22	15	4	0.00915507	0.0511945	0.0041939	0.0144592	0.121455	0.0212139	0.0494649	0.0305753	0.042557	0.00277775	0.0115432	0.0246772	0.18501	0.411662
2010-06-23	16	4	0.0157725	0.0665586	0.00653221	0.0160317	0.0878853	0.0191533	0.0445486	0.0266915	0.0341561	0.00236495	0.0141726	0.0235486	0.195758	0.397791
2010-06-24	17	4	0.0147496	0.0844533	0.0067955	0.0233027	0.100429	0.0315073	0.0675792	0.0287122	0.0370853	0.00194643	0.0158987	0.0350851	0.301186	0.523144
2010-06-25	18	4	0.00458344	0.0339631	0.0138543	0.0293735	0.0605639	0.0344231	0.0803838	0.0442984	0.0206211	0.00168557	0.00610655	0.0300134	0.383038	0.55053
2010-06-26	19	4	0.00588569	0.0815951	0.0093783	0.0237869	0.0565709	0.0244857	0.0555386	0.0315509	0.0215848	0.00308734	0.00582304	0.0209846	0.239216	0.317321
2010-06-27	20	4	0.00796299	0.15714	0.0358958	0.0265512	0.113725	0.0263728	0.0726789	0.0325571	0.0613569	0.00615175	0.0216773	0.0517552	0.284305	0.54781
2010-06-28	21	4	0.00183731	0.0510635	0.00630653	0.0146412	0.0877558	0.0171659	0.0513176	0.0217627	0.0327623	0.00331667	0.0119657	0.0335146	0.212151	0.36595
2010-06-29	22	4	0.0071722	0.0761919	0.0113781	0.00836347	0.153431	0.0158663	0.041718	0.0205253	0.0504897	0.00415945	0.0172468	0.0309028	0.132081	0.457657
2010-06-30	23	4	0.00730596	0.146354	0.00733463	0.0086697	0.25854	0.0126248	0.0268926	0.0148152	0.0762504	0.0036062	0.0152705	0.0230899	0.123097	0.520022
2010-07-01	24	4	0.00411526	0.170111	0.00413748	0.0140702	0.529082	0.0186603	0.0338335	0.0167806	0.100184	0.00696013	0.0132915	0.0306889	0.150781	1.06013
2010-07-02	25	4	0	0.301137	0.013497	0.014844	1.02723	0.0320004	0.0550191	0.0285547	0.128414	0.0106294	0.0155707	0.0348853	0.237115	1.88664
2010-07-03	26	4	0.00753021	0.408633	0.010187	0.0114962	0.680293	0.0141071	0.0331039	0.0205049	0.143305	0.00837624	0.0188755	0.0273566	0.12863	1.23337
2010-07-04	27	4	0.0071958	0.611691	0.00544769	0.0151792	1.39347	0.0363618	0.0560734	0.02771	0.253341	0.00975221	0.0185503	0.0343139	0.260523	2.55785
2010-07-05	28	4	0.00874984	0.590156	0.0306362	0.0166359	0.86133	0.0206904	0.0453202	0.019333	0.136184	0.00709486	0.0197705	0.0322369	0.182085	1.52267
2010-07-06	29	4	0.0135615	0.268184	0.0033476	0.0136894	0.633381	0.0170807	0.0414506	0.0137067	0.119749	0.00436871	0.0176164	0.0299572	0.167248	1.06556
2010-07-07	30	4	0.010953	0.229607	0.00414375	0.0158745	0.377427	0.0108656	0.0355181	0.0139194	0.0909968	0.00609441	0.0134583	0.0343787	0.144516	0.754232
2010-06-07	0	5	0	0.0279554	0	0.00311923	0.0677796	0.00398901	0.0141387	0.00912658	0.0326568	0.00688524	0.00314778	0.0221322	0.0652362	0.235806
2010-06-08	1	5	0	0.0463671	0.00470169	0.0126166	0.190557	0.0115276	0.0323098	0.0194381	0.0848884	0.00746035	0.00601413	0.0320268	0.164726	0.654576
2010-06-09	2	5	0.00608953	0.0558782	0.0028504	0.00538106	0.0823722	0.00590648	0.0108475	0.00969603	0.0396777	0.00435098	0.00546431	0.00876266	0.0711619	0.258782
2010-06-11	4	5	0.00911032	0.113227	0	0.0080425	0.137013	0.00594357	0.0133616	0.00946978	0.065745	0.00364955	0.0131826	0.00600009	0.0961662	0.390294
2010-06-13	6	5	0.0140638	0.129997	0.0119893	0.0145797	0.352368	0.014187	0.0379467	0.0226707	0.144319	0.0110105	0.0211198	0.0112587	0.166326	0.868663
2010-06-15	8	5	0.013127	0.14766	0.00372021	0.0125662	0.341674	0.0144523	0.0464915	0.0186424	0.176017	0.00786616	0.031152	0.0253961	0.263002	0.947474
2010-06-17	10	5	0.015233	0.134723	0.00729937	0.0103354	0.183138	0.00905375	0.026476	0.00774608	0.07052	0.00342918	0.0158561	0.0184251	0.129628	0.433947
2010-06-19	12	5	0.010984	0.0597172	0	0.00867876	0.0831007	0.00760994	0.0180386	0.00602047	0.0280809	0.00236495	0.00679586	0.0134725	0.0840861	0.178684
2010-06-20	13	5	0.0037533	0.0441124	0	0.0114217	0.115782	0.00899687	0.0245128	0.0110439	0.0422167	0.00205823	0.00842187	0.0235655	0.148474	0.33284
2010-06-21	14	5	0.00800233	0.0490263	0.0173335	0.0156344	0.142176	0.0172815	0.0393037	0.0252006	0.050427	0.00375239	0.00890272	0.0288454	0.215302	0.520692
2010-06-22	15	5	0.00669615	0.0594539	0.0087514	0.0198058	0.136193	0.0317843	0.0631748	0.0430713	0.0455869	0.00539496	0.0096921	0.0384596	0.281136	0.597156
2010-06-23	16	5	0.00839576	0.0906366	0.00783614	0.0185147	0.110462	0.0296203	0.0651459	0.0361157	0.0375317	0.00639541	0.0137474	0.0358084	0.262623	0.507279
2010-06-24	17	5	0.00961145	0.105657	0.0149514	0.0372942	0.104379	0.0398559	0.0975736	0.039932	0.0480614	0.00713499	0.0115738	0.044052	0.490417	0.748168
2010-06-25	18	5	0.0212333	0.13721	0.0171517	0.0439651	0.0863636	0.043916	0.104713	0.0463927	0.0365027	0.0052717	0.00645398	0.027351	0.518344	0.640581
2010-06-26	19	5	0.0177672	0.13186	0.0312944	0.0464936	0.0881515	0.0498145	0.11353	0.0581033	0.0411305	0.00654734	0.00861087	0.0298502	0.468716	0.648576
2010-06-27	20	5	0.0114724	0.0996495	0.0428104	0.046564	0.118437	0.0453465	0.12714	0.0569989	0.0771786	0.00886356	0.0169744	0.0602746	0.52489	0.80637
2010-06-28	21	5	0.00606666	0.0843755	0.0329243	0.0306605	0.133711	0.0332939	0.0920843	0.0251822	0.0717341	0.00387279	0.0192675	0.0555463	0.367189	0.667564
2010-06-29	22	5	0.00500047	0.0811651	0.0708763	0.0255125	0.130786	0.0238222	0.0708758	0.0375064	0.105885	0.00721813	0.0173385	0.0378602	0.27549	0.692844
2010-06-30	23	5	0.011256	0.120226	0.0722179	0.0173684	0.116678	0.0154767	0.0377681	0.0171304	0.08975	0.0087833	0.0177332	0.0226902	0.117282	0.470801
2010-07-01	24	5	0.0059565	0.0943958	0.090241	0.0163628	0.196538	0.0213265	0.0448045	0.0230552	0.0947209	0.0107699	0.0145618	0.0225101	0.180772	0.724228
2010-07-02	25	5	0.0143326	0.259287	0.142029	0.0116575	0.247443	0.0123996	0.0301472	0.0152018	0.0917917	0.0104029	0.00867758	0.0119587	0.146242	0.805337
2010-07-03	26	5	0.00577159	0.142474	0.108158	0.0129735	0.263282	0.0116752	0.0295934	0.0157294	0.117256	0.0141181	0.010362	0.0170106	0.141684	0.812646
2010-07-04	27	5	0.0198996	0.278499	0.12294	0.0146744	0.312165	0.012564	0.0301511	0.0154881	0.117754	0.0119796	0.0108372	0.0141455	0.149017	0.931652
2010-07-05	28	5	0.00623584	0.24256	0.155563	0.0137308	0.428419	0.0143049	0.0325806	0.0191019	0.146961	0.0154424	0.0116767	0.0182912	0.191969	1.22395
2010-07-06	29	5	0.00970194	0.178999	0.116251	0.00887248	0.294927	0.0133705	0.0299983	0.0139031	0.121764	0.0124726	0.0103175	0.0171964	0.130674	0.781184
2010-07-07	30	5	0.0131287	0.280227	0.0772957	0.00926562	0.357189	0.00777334	0.0247458	0.0107147	0.0989485	0.00795198	0.00898054	0.0178268	0.124691	0.747592
2010-06-07	0	6	0	0.022959	0.0166792	0.00477196	0.0495987	0.00467382	0.00994149	0.00771349	0.0254293	0.00399623	0.0039686	0.0198974	0.0558464	0.205164
2010-06-08	1	6	0.00174461	0.0367543	0.00582421	0.00739848	0.0908775	0.00591504	0.0172006	0.0112088	0.0407955	0.00484278	0.00400768	0.0194277	0.0759975	0.32958
2010-06-09	2	6	0.0047654	0.0425128	0	0.0025722	0.0724235	0.00611763	0.0132147	0.00986284	0.0352702	0.00494759	0.00479202	0.0064935	0.0629327	0.243694
2010-06-11	4	6	0.00489449	0.0803766	0.00461353	0.00713466	0.185276	0.00648001	0.0148764	0.0086875	0.0936243	0.0069363	0.0169688	0.00522963	0.126498	0.606244
2010-06-13	6	6	0.0138868	0.120335	0.00430792	0.00763125	0.244119	0.0177308	0.0255198	0.014453	0.0856183	0.014961	0.00970391	0.00961755	0.130613	0.574656
2010-06-15	8	6	0.0175014	0.144666	0.0103143	0.0141878	0.350209	0.038589	0.0421188	0.0197544	0.164468	0.00841977	0.0223133	0.0187206	0.20967	0.924461
2010-06-17	10	6	0.0171363	0.108964	0.00237435	0.00675058	0.15687	0.00806933	0.026254	0.0107832	0.0568968	0.00259876	0.0114628	0.0107838	0.110251	0.382066
2010-06-19	12	6	0.0114672	0.0489527	0	0.00706483	0.0896129	0.0063031	0.0163483	0.00760804	0.0189648	0.00141897	0.00497964	0.0118076	0.0710389	0.202798
2010-06-20	13	6	0.0108704	0.0438196	0.00411868	0.0111403	0.136787	0.0103726	0.0287033	0.0149318	0.0423447	0.00362053	0.0114821	0.0155921	0.139958	0.35659
2010-06-21	14	6	0.0137621	0.0556252	0.0119109	0.00965462	0.104127	0.0141345	0.0366221	0.0253908	0.0427993	0.00286374	0.00722113	0.02195	0.168486	0.38866
2010-06-22	15	6	0.00712892	0.0525069	0.0099425	0.0211135	0.109685	0.0236548	0.0559206	0.0375473	0.0484725	0.00556982	0.0109456	0.032417	0.209487	0.494276
2010-06-23	16	6	0.0153162	0.086466	0.0168007	0.017058	0.0928459	0.0253927	0.0522	0.0308984	0.0395598	0.00397026	0.0140976	0.0300613	0.227306	0.45011
2010-06-24	17	6	0.0131051	0.0935195	0.0154968	0.0242628	0.0808202	0.032253	0.0665096	0.0345716	0.0421106	0.00442318	0.00904169	0.022724	0.318911	0.527308
2010-06-25	18	6	0.0184951	0.141065	0.0225179	0.0390778	0.0816008	0.0448261	0.0977799	0.055733	0.0423365	0.00346573	0.00803552	0.0300838	0.474005	0.642292
2010-06-26	19	6	0.0151076	0.103431	0.0396634	0.0360031	0.0780359	0.0424764	0.0977494	0.0514442	0.0434635	0.00273188	0.00675973	0.0297827	0.401681	0.572514
2010-06-27	20	6	0.0103668	0.102897	0.0386416	0.0412463	0.102659	0.0417338	0.116143	0.0493541	0.0602408	0.00660754	0.0191535	0.0697086	0.514049	0.761045
2010-06-28	21	6	0.00406805	0.0773835	0.0280283	0.0293735	0.0684384	0.0300068	0.0797305	0.0291703	0.0565412	0.00600842	0.0133805	0.054246	0.315591	0.528577
2010-06-29	22	6	0.00885213	0.0979604	0.0782674	0.0186968	0.100501	0.0259193	0.0697757	0.0366597	0.0979848	0.0104861	0.0161989	0.0380487	0.250263	0.596557
2010-06-30	23	6	0.00358806	0.127372	0.0885547	0.0132963	0.0923891	0.013544	0.037642	0.0194803	0.089388	0.00573609	0.0135139	0.0251022	0.136451	0.467427
2010-07-01	24	6	0.00238024	0.102801	0.113085	0.0202279	0.171292	0.0227539	0.0578803	0.0313607	0.104722	0.0148576	0.0124855	0.029929	0.260767	0.803026
2010-07-02	25	6	0.0136402	0.313958	0.18761	0.017985	0.215495	0.0144936	0.0410227	0.0210407	0.101701	0.00847657	0.0103786	0.0225748	0.229631	0.875595
2010-07-03	26	6	0.00370609	0.154345	0.159136	0.0148606	0.192782	0.0124422	0.0395864	0.020826	0.121339	0.0145108	0.00978104	0.0285105	0.209787	0.800597
2010-07-04	27	6	0.0138605	0.289397	0.140913	0.0197893	0.281538	0.0161037	0.0448847	0.0237158	0.109715	0.0134272	0.00741847	0.0202473	0.169931	0.898573
2010-07-05	28	6	0.00627911	0.326933	0.222941	0.0144757	0.431189	0.0180698	0.051203	0.0285526	0.161163	0.012487	0.0125327	0.0281672	0.235033	1.38099
2010-07-06	29	6	0.00878132	0.210402	0.123648	0.0152372	0.287153	0.0155041	0.0370843	0.0215847	0.0957689	0.00894669	0.0085803	0.0214265	0.160834	0.760784
2010-07-07	30	6	0.00441033	0.211576	0.168182	0.0191561	0.498325	0.0232013	0.04367	0.017521	0.149474	0.0102911	0.0162267	0.0345926	0.17839	1.22308
2010-06-07	0	7	0	0.016642	0.0057772	0.00590869	0.0615844	0.00839176	0.016334	0.0124436	0.0254267	0.00514646	0.00529754	0.0199211	0.0692805	0.23276
2010-06-08	1	7	0	0.0290841	0	0.00457798	0.0896601	0.00657987	0.0147045	0.0104706	0.0396241	0.00364687	0.00284551	0.0119316	0.0770877	0.28141
2010-06-09	2	7	0.00555471	0.0594868	0	0.00763901	0.108384	0.0070678	0.0185543	0.0118358	0.0545132	0.0027627	0.00863554	0.0102323	0.0958673	0.381874
2010-06-11	4	7	0.00830994	0.0902082	0.00241549	0.0050125	0.177064	0.00758711	0.0246747	0.0109883	0.0922257	0.00504971	0.0251509	0.0107231	0.131105	0.650939
2010-06-13	6	7	0.0130126	0.084181	0.00720533	0.00632382	0.199703	0.0176938	0.0255019	0.0124723	0.0787378	0.00523515	0.0127865	0.00656738	0.111763	0.550623
2010-06-15	8	7	0.0213816	0.0912966	0.0055186	0.00888438	0.177384	0.0102122	0.0290509	0.00889266	0.0553069	0.0039613	0.0143422	0.0145121	0.126481	0.494462
2010-06-17	10	7	0.0219902	0.0756604	0.00612982	0.0071463	0.138308	0.0121268	0.0277294	0.00686027	0.0334455	0.00168503	0.0145376	0.0120345	0.13267	0.337571
2010-06-19	12	7	0.0111057	0.0371421	0.00196295	0.00739848	0.0866586	0.00568962	0.0210898	0.00635793	0.0202485	0.00103467	0.0070851	0.00838007	0.0568663	0.162287
2010-06-20	13	7	0.013186	0.0476297	0.00466495	0.0106205	0.149842	0.011895	0.0319311	0.0129157	0.0528926	0.00430999	0.00860557	0.0128135	0.121878	0.394436
2010-06-21	14	7	0.0134277	0.0532276	0.0206247	0.00913319	0.11711	0.0103208	0.0330466	0.00984545	0.0372132	0.00381546	0.0120741	0.0152122	0.128705	0.382186
2010-06-22	15	7	0.0100442	0.0412111	0.00457631	0.0164952	0.114347	0.0172663	0.0422566	0.0227812	0.0427448	0.00437445	0.0154012	0.0229182	0.183435	0.443502
2010-06-23	16	7	0.00769545	0.0520135	0.00572352	0.0106395	0.0766689	0.0147949	0.0333025	0.0169872	0.0297434	0.00352593	0.00833292	0.0156372	0.116851	0.286498
2010-06-24	17	7	0.0108193	0.0402939	0.0155532	0.0165242	0.0897379	0.0183985	0.0453049	0.0237547	0.0351634	0.00417379	0.0102591	0.0188569	0.204329	0.407743
2010-06-25	18	7	0.0134277	0.0775166	0.00898962	0.0160896	0.0656469	0.0141162	0.0371416	0.020965	0.0271872	0.00197796	0.00994225	0.0165434	0.1897	0.319096
2010-06-26	19	7	0.0132782	0.0555392	0.0178351	0.0181009	0.0632259	0.0206204	0.0477917	0.0282295	0.0258914	0.00242802	0.0103369	0.0169965	0.190018	0.332974
2010-06-27	20	7	0.00358806	0.053373	0.0213268	0.0200914	0.0908386	0.0223978	0.05534	0.0323771	0.0443319	0.00577622	0.00987554	0.0358506	0.239366	0.445702
2010-06-28	21	7	0.0081715	0.0462417	0.0206247	0.0197603	0.0884069	0.0227083	0.055657	0.029156	0.057641	0.00747039	0.00786875	0.0364529	0.250582	0.456324
2010-06-29	22	7	0.00243139	0.0638764	0.0246682	0.0145378	0.140809	0.0168006	0.0445638	0.0215029	0.0713993	0.00771118	0.0129441	0.0264391	0.173813	0.4921
2010-06-30	23	7	0.00418608	0.0986831	0.0333694	0.0138798	0.160968	0.0139062	0.0289936	0.0149891	0.0819126	0.00621768	0.012466	0.0247729	0.108448	0.41331
2010-07-01	24	7	0.00315529	0.129485	0.0396822	0.0192223	0.362552	0.0171202	0.053132	0.0279248	0.102931	0.0160272	0.0181584	0.038606	0.205605	0.98461
2010-07-02	25	7	0.0113819	0.464393	0.144273	0.0234268	0.583332	0.0209034	0.0525896	0.0294402	0.139273	0.0116155	0.00968654	0.0351695	0.237096	1.48501
2010-07-03	26	7	0.00219139	0.211465	0.0549533	0.0214115	0.484364	0.0277302	0.050141	0.0290128	0.14263	0.015259	0.0186532	0.0428812	0.236158	1.15944
2010-07-04	27	7	0.016406	0.445053	0.0390867	0.0103457	0.495497	0.0196373	0.0334974	0.0165986	0.103007	0.00808384	0.00432767	0.0251388	0.148961	0.962562
2010-07-05	28	7	0.00216385	0.251093	0.0465906	0.0162469	0.455665	0.0169285	0.0390172	0.0217708	0.105988	0.00837624	0.00879432	0.0293464	0.180115	1.02582
2010-07-06	29	7	0.00405231	0.156055	0.0214898	0.0187837	0.451341	0.0131362	0.0449802	0.017656	0.107956	0.0105606	0.0134416	0.0422535	0.158039	0.888779
2010-06-07	0	8	0	0.0164596	0.00880978	0.0054509	0.055949	0.0077469	0.0144073	0.0096596	0.0240613	0.00397205	0.00232175	0.0175068	0.0730434	0.199694
2010-06-08	1	8	0.00468794	0.0366257	0.00302671	0.00805801	0.0807669	0.00819488	0.0166241	0.0120467	0.0442945	0.0101747	0.0039712	0.0184541	0.0968872	0.330533
2010-06-09	2	8	0.00277736	0.0561431	0	0.00385248	0.123165	0.00809216	0.0213871	0.0184871	0.0658675	0.00742542	0.0087528	0.0125173	0.096219	0.436963
2010-06-11	4	8	0.00759439	0.0879624	0.00940925	0.00514052	0.163665	0.00754431	0.0152166	0.0115808	0.0816166	0.00489922	0.0151239	0.00774417	0.0980125	0.549248
2010-06-13	6	8	0.00828412	0.0837607	0.00853356	0.00746831	0.250492	0.00757285	0.0254375	0.0140292	0.0944257	0.00505778	0.013167	0.00659112	0.114594	0.646282
2010-06-15	8	8	0.0204079	0.102539	0.00883917	0.00867488	0.233472	0.011793	0.029452	0.00986092	0.088959	0.00662187	0.0150405	0.011863	0.154105	0.57507
2010-06-17	10	8	0.0170182	0.0649938	0.00591825	0.0078136	0.128794	0.00987266	0.0247893	0.00797425	0.0365769	0.00424348	0.00549297	0.0125411	0.09592	0.311926
2010-06-19	12	8	0.0163469	0.0541065	0.00436669	0.00933442	0.1121	0.00950458	0.0314611	0.0134234	0.0319499	0.00333512	0.0118954	0.0179	0.136117	0.346095
2010-06-20	13	8	0.00728236	0.0414671	0.00446974	0.0106395	0.127585	0.0133036	0.0290509	0.0107617	0.0408365	0.00421678	0.0103647	0.0167235	0.115275	0.364941
2010-06-21	14	8	0.00560635	0.0392292	0.00979204	0.0145999	0.0899861	0.0135257	0.0407477	0.0229427	0.0345536	0.00477004	0.00741013	0.0180492	0.168261	0.39955
2010-06-22	15	8	0.00656632	0.0426095	0.00858841	0.0174925	0.087468	0.0213021	0.0447434	0.0247793	0.038999	0.00389286	0.0163212	0.0316852	0.171131	0.398611
2010-06-23	16	8	0.00604306	0.0466758	0.0162114	0.0219536	0.0843312	0.0244096	0.0628424	0.0368581	0.0367232	0.00321347	0.00907505	0.0320708	0.255121	0.447059
2010-06-24	17	8	0.00840363	0.0553877	0.0111211	0.0255746	0.0648015	0.0295807	0.060665	0.0276977	0.0293541	0.00409639	0.00647344	0.0335372	0.306081	0.440143
2010-06-25	18	8	0.00991439	0.0934887	0.0146066	0.0263029	0.0645353	0.0311451	0.0746805	0.0413186	0.0313332	0.00228469	0.00645676	0.0335118	0.332509	0.498716
2010-06-26	19	8	0.00380052	0.0728422	0.0235837	0.0348816	0.0639849	0.0386689	0.0851243	0.0397868	0.0333204	0.00297554	0.00567573	0.0303624	0.335491	0.480981
2010-06-27	20	8	0.0102449	0.0802151	0.0373439	0.0308261	0.0863169	0.0314616	0.0822823	0.0326696	0.0527655	0.00740732	0.017105	0.0490054	0.333259	0.562287
2010-06-28	21	8	0.00265171	0.0612475	0.0377639	0.0187092	0.0839966	0.027298	0.0666089	0.023319	0.0772331	0.00913876	0.01447	0.0545246	0.287044	0.571868
2010-06-29	22	8	0.00666074	0.0760199	0.0654036	0.0192637	0.100814	0.0209491	0.0541902	0.0241064	0.0909369	0.00939675	0.0180556	0.0364923	0.20161	0.492376
2010-06-30	23	8	0.00182551	0.10769	0.113749	0.0128328	0.158745	0.0167793	0.0453966	0.024088	0.150737	0.00787745	0.0220636	0.0417019	0.18501	0.725182
2010-07-01	24	8	0.0074712	0.137744	0.144179	0.020319	0.242691	0.0272371	0.0617003	0.030336	0.134782	0.011346	0.0127885	0.0428615	0.282711	1.05159
2010-07-02	25	8	0.0115511	0.419996	0.227906	0.0215687	0.25672	0.0219991	0.0485825	0.0269574	0.130197	0.00513697	0.0118962	0.0290199	0.250863	1.00017
2010-07-03	26	8	0.0065191	0.234521	0.245334	0.0219246	0.30632	0.0233626	0.0569291	0.0316756	0.184675	0.0149694	0.0166547	0.043703	0.278435	1.23035
2010-07-04	27	8	0.0114763	0.350442	0.226145	0.0276851	0.380168	0.0214908	0.0574219	0.030831	0.169784	0.0137683	0.0111875	0.0377138	0.271495	1.3161
2010-07-05	28	8	0	0.241481	0.279368	0.023493	0.416285	0.022897	0.0633696	0.036809	0.194554	0.00968054	0.0107455	0.0418708	0.284512	1.49668
2010-06-06	29	8	0.00452049	0.120476	0.122601	0.0128287	0.250752	0.0188459	0.0438495	0.0230675	0.108776	0.0102596	0.0162239	0.0397965	0.217046	0.790749
2010-07-07	30	8	0.00870657	0.187033	0.125303	0.0150965	0.136834	0.0139031	0.0333713	0.0175087	0.0968578	0.00939102	0.0143061	0.0295406	0.138777	0.524556
2010-06-07	0	9	0	0.0111733	0.00322653	0.00726269	0.0523675	0.00362663	0.0118288	0.00930105	0.0233723	0.00293738	0.00472427	0.0210372	0.065834	0.211514
2010-06-08	1	9	0.00233106	0.0255829	0.00269171	0.00481851	0.0740119	0.00542426	0.0125701	0.00842866	0.0364518	0.00510884	0.00238168	0.0120424	0.0457357	0.236419
2010-06-09	2	9	0.00208763	0.0461579	0	0.00437624	0.0710947	0.00506759	0.014658	0.00883706	0.0360894	0.00279226	0.00599328	0.0081637	0.053666	0.214427
2010-06-11	4	9	0.00427853	0.0753437	0.00323241	0.00420941	0.125	0.00686236	0.0164557	0.0108388	0.0580682	0.00281645	0.0137637	0.00645656	0.0760151	0.399831
2010-06-13	6	9	0.00416788	0.0717581	0.0125124	0.00944693	0.245211	0.00866569	0.0298603	0.0152314	0.106076	0.00997849	0.0196293	0.0126466	0.139845	0.63146
2010-06-15	8	9	0.0137319	0.135046	0.00946802	0.0154449	0.242645	0.0138988	0.0355222	0.0205233	0.0933257	0.0100242	0.0167682	0.0144699	0.183277	0.683481
2010-06-17	10	9	0.0170994	0.110768	0.00968547	0.0111074	0.213618	0.0271213	0.0500226	0.0219939	0.0642444	0.0122171	0.00722321	0.0141955	0.202812	0.521267
2010-06-19	12	9	0.0196001	0.0813383	0.00787532	0.0204302	0.177084	0.0213889	0.0526942	0.0201878	0.0485182	0.0136254	0.0148477	0.0267392	0.25938	0.564092
2010-06-20	13	9	0.0154814	0.0745017	0.0169966	0.0206293	0.278358	0.0206204	0.0613011	0.0302046	0.0878438	0.0134838	0.0144603	0.0338545	0.291564	0.763221
2010-06-21	14	9	0.0128855	0.0777538	0.0116342	0.0184039	0.175941	0.0213566	0.0525418	0.0333137	0.0627743	0.0138309	0.0140518	0.0260348	0.26939	0.652342
2010-06-22	15	9	0.00637354	0.0732783	0.0184557	0.0251028	0.175386	0.0340183	0.0769993	0.0503603	0.0755262	0.0205794	0.0151204	0.034798	0.341399	0.751661
2010-06-23	16	9	0.00683385	0.0828113	0.0419516	0.0261871	0.159766	0.0388819	0.0960304	0.0592793	0.0789699	0.0163053	0.015907	0.0385582	0.393823	0.832446
2010-06-24	17	9	0.0150958	0.131266	0.0340214	0.0295556	0.107228	0.0341796	0.0829852	0.0406375	0.0677324	0.0100647	0.00976158	0.0294534	0.408546	0.666878
2010-06-25	18	9	0.0279255	0.229034	0.0530475	0.0381095	0.110368	0.0441778	0.104778	0.0546163	0.0727931	0.012765	0.00721557	0.0292732	0.494055	0.798595
2010-06-26	19	9	0.0116612	0.150043	0.106847	0.0536446	0.159809	0.0640312	0.147176	0.066239	0.109435	0.0168327	0.0118379	0.035603	0.603178	1.04777
2010-06-27	20	9	0.0137503	0.152011	0.11736	0.0374929	0.139539	0.0414325	0.112918	0.0554262	0.14242	0.0207543	0.0256269	0.0473702	0.467084	0.948747
2010-06-28	21	9	0.0051067	0.0962897	0.107274	0.0292866	0.121718	0.0233626	0.0734772	0.0267652	0.11807	0.0225459	0.023231	0.0462726	0.275903	0.772975
2010-06-29	22	9	0.0053939	0.11977	0.14075	0.0193465	0.121023	0.0128805	0.0457022	0.0253192	0.137618	0.0237785	0.0256547	0.0318654	0.170962	0.739612
2010-06-30	23	9	0.0074712	0.103411	0.118514	0.00694404	0.0853456	0.0117087	0.022259	0.00967775	0.103467	0.0208689	0.0227585	0.0200953	0.0897481	0.507035
2010-07-01	24	9	0.0078961	0.123173	0.102848	0.00828484	0.10921	0.00869555	0.0191992	0.0132732	0.0815506	0.0249424	0.011874	0.0170866	0.0884539	0.558313
2010-07-02	25	9	0.00874591	0.221418	0.217074	0.00907526	0.139866	0.00757247	0.0239627	0.0132016	0.108419	0.0257422	0.0107177	0.0123668	0.127073	0.786246
2010-07-03	26	9	0.00984357	0.137955	0.158829	0.00403897	0.152446	0.00611154	0.0173847	0.0101788	0.115396	0.033396	0.0146257	0.0144945	0.0858281	0.701439
2010-07-04	27	9	0.0146041	0.201193	0.16911	0.00781308	0.20348	0.00972125	0.0184161	0.00923599	0.11783	0.0309938	0.0160627	0.0145817	0.0327107	0.741481
2010-07-05	28	9	0.0161424	0.242752	0.154779	0.0047673	0.159194	0.00533542	0.0111276	0.00823386	0.0927608	0.0203357	0.0102424	0.00839555	0.066603	0.621892
2010-07-06	29	9	0.00965473	0.113544	0.140988	0.00357134	0.12202	0.00421538	0.0106959	0.00717241	0.0895295	0.0267713	0.00885825	0.00909072	0.0300098	0.462632
2010-07-07	30	9	0.00897016	0.365266	0.125391	0.00494939	0.363437	0.00679939	0.0133432	0.00706198	0.117874	0.0274363	0.0184419	0.0117166	0.0631144	0.94564
2010-06-07	0	10	0.00442607	0.0633488	0.00661762	0.00315027	0.169429	0.0066455	0.0176375	0.012156	0.0894363	0.00973125	0.0107436	0.0222299	0.0684892	0.536873
2010-06-08	1	10	0.00856075	0.0988536	0.00138112	0.00924519	0.267705	0.0073674	0.0243703	0.0171488	0.137	0.0113195	0.0148972	0.0193011	0.134956	0.755728
2010-06-09	2	10	0.0075907	0.0692282	0	0.00937321	0.23536	0.010021	0.0331371	0.015542	0.0956303	0.0153346	0.009928	0.0174937	0.99217	0.634335
2010-06-11	4	10	0.0100841	0.138259	0	0.00434132	0.384558	0.00868566	0.0246209	0.00808737	0.176611	0.0046466	0.0209843	0.0102561	0.0706872	0.0975366
2010-06-13	6	10	0.0196407	0.166383	0.00348512	0	0.435283	0	0.0177128	0.00520368	0.216378	0.00752217	0.0159526	0.00292616	0.0347809	0.954475
2010-06-15	8	10	0.0203599	0.170038	0.0124947	0.0356578	0.419146	0.0106773	0.00702279	0.00692163	0.212706	0.00456866	0.0236865	0.00331931	0.00903811	0.845739
2010-06-17	10	10	0.0275781	0.199095	0.00488388	0	0.489748	0.0063887	0.0135872	0.00113315	0.245498	0.00979306	0.0260812	0.00345387	0	0.771703
2010-06-19	12	10	0.0529579	0.11706	0.0126358	0	0.311875	0.00643435	0.00655723	0.00255966	0.104131	0.030696	0.0174509	0.00681012	0.0188147	0.59599
2010-06-20	13	10	0.00674336	0.0629878	0.00405599	0	0.213549	0	0.00484373	0.00118824	0.10282	0.013582	0.0136834	0.0122373	0.0125666	0.473893
2010-06-21	14	10	0.0230037	0.0901186	0.0120551	0	0.202592	0	0.0124226	0.00337658	0.0883018	0.0154453	0.0155707	0.0110834	0.0287532	0.440388
2010-06-22	15	10	0.0112206	0.0469788	0.011284	0	0.18757	0.00143962	0.00852619	0.00582669	0.0731606	0.0423398	0.00774089	0.0086404	0.0276841	0.478064
2010-06-23	16	10	0.0147103	0.0476319	0.0135158	0	0.111825	0	0.0116853	0.00195314	0.0593506	0.0390404	0.0104009	0.00888245	0.0185123	0.32389
2010-06-24	17	10	0.0210877	0.113007	0.00935949	0	0.174461	0	0.0035373	0.0017384	0.0733838	0.0236839	0.0066819	0.00461854	0.0180434	0.404289
2010-06-25	18	10	0.0204937	0.167748	0.0160672	0	0.454211	0.014171	0.0104667	0.00279779	0.218257	0.037587	0.0195426	0.00946223	0.0522733	1.01954
2010-06-26	19	10	0.0103196	0.102553	0.00954129	0	0.310385	0	0.00760939	0.00259532	0.141372	0.0335479	0.0159015	0.00730635	0.0465152	0.729811
2010-06-27	20	10	0.0123025	0.115032	0.0194399	0	0.314327	0	0.00912592	0.00395945	0.198499	0.0305953	0.0279728	0.0113141	0.0286219	0.748649
2010-06-28	21	10	0.00312775	0.0838555	0.0151332	0	0.212308	0.00139397	0.00409119	0.00101236	0.160491	0.0152733	0.0195788	0.00819853	0.0257522	0.514155
2010-06-29	22	10	0.00486277	0.0683358	0.0131083	0	0.178163	0.00100134	0.00486665	0.00202881	0.117718	0.0253294	0.0132026	0.0118461	0	0.441082
2010-06-30	23	10	0.00564176	0.0553713	0.0118482	0.00571497	0.132574	0.000721332	0.00592096	0.00343589	0.103364	0.0225717	0.0151455	0.0106162	0.024533	0.349147
2010-07-01	24	10	0.018676	0.109868	0.00430674	0	0.192257	0.000566109	0.00339596	0.00289596	0.0508653	0.00735572	0.00447221	0.00704742	0.0351302	0.366628
2010-07-02	25	10	0.0233696	0.149517	0.0146442	0	0.224251	0	0.006578	0.0047857	0.072559	0.0155256	0.00446387	0.00553886	0.0273089	0.421944
2010-07-03	26	10	0.024188	0.165062	0.0129704	0.00148151	0.264713	0	0.00439679	0.00275894	0.122256	0.0247847	0.0181334	0.00623122	0.0156239	0.541817
2010-07-04	27	10	0.016823	0.1346	0.0111399	0.00453556	0.312467	0.0113313	0.0106195	0.00561808	0.106383	0.0214136	0.0180389	0.0113986	0.0491036	0.634099
2010-07-05	28	10	0.0223625	0.131301	0.0217469	0	0.244079	0	0.00357932	0.00188769	0.111367	0.0147057	0.0210463	0.00862352	0.019	0.481991
2010-07-06	29	10	0.0299635	0.189111	0.0145501	0	0.370661	0	0.0026969	0.00559559	0.147171	0.0184036	0.0241371	0.0102334	0.0492911	0.620591
2010-07-07	30	10	0.0174485	0.135204	0.0122369	0	0.417073	0.00277576	0.012285	0.00863676	0.151488	0.0148605	0.0234561	0.0153951	0.0471342	0.767795

## Sheet: Ratios
Pigment Data Configuration
Output Relative	0	0	0	0	0	0	0	0	0	0	0	0	0	0
Output Absolute	0	0	0	0	0	0	0	0	0	0	0	0	0	1
RATIOS
Name	Testrun1
Pigment Selection	1	1	1	1	1	1	1	1	1	1	1	1	1	1
Class / Pigment	c3	c12	perid	but	fucox	neox	prasinox	violax	diad	allox	diato	zeax	chl_b	chl_a
Prasino	0	0.112	0	0	0	0.0525	0.19225	0.061	0	0	0	0.07225	0.50925	1
Dinoflagellates	0	0.2845	0.5315	0	0	0	0	0	0.1205	0	0.1005	0	0	1
Cryptophytes	0	0.1255	0	0	0	0	0	0	0	0.1355	0	0	0	1
Chlorophytes	0	0	0	0	0	0.037	0	0.0275	0	0	0	0.059	0.2845	1
Cyanobacteria_1	0	0	0	0	0	0	0	0	0	0	0	0.3335	0	1
Diatoms	0	0.0915	0	0	0.457	0	0	0	0.239	0	0.1345	0	0	1
Chrysopytes	0.125	0.268	0	0.933	0.6245	0	0	0	0.4375	0	0.0505	0	0	1
Haptophyceae	0.05075	0.21625	0	0	0.722	0	0	0	0.13025	0	0.00525	0	0	1

## Sheet: Ratio Limits
RATIO LIMITS
Name	A
Class / Pigment	c3	c12	perid	but	fucox	neox	prasinox	violax	diad	allox	diato	zeax	chl_b	chl_a
Prasinophytes_1	500	500	500	500	500	500	500	500	500	500	500	500	500	100
Dinoflagellates	500	500	500	500	500	500	500	500	500	500	500	500	500	100
Cryptophytes	500	500	500	500	500	500	500	500	500	500	500	500	500	100
Chlorophytes	500	500	500	500	500	500	500	500	500	500	500	500	500	100
Cyanobacteria_1	500	500	500	500	500	500	500	500	500	500	500	500	500	100
Diatoms	500	500	500	500	500	500	500	500	500	500	500	500	500	100
Chrysopytes	500	500	500	500	500	500	500	500	500	500	500	500	500	100
Haptophyceae	500	500	500	500	500	500	500	500	500	500	500	500	500	100

## Sheet: Convergence
Convergence Run
Best (min RMS), average & standard deviation (over all runs) of final ratio matrices.
Bin :	1	RMS Min :	0.0109754	Run # :	1
Class	Prasinophytes_1	Prasinophytes_1	Prasinophytes_1	Prasinophytes_1	Prasinophytes_1	Prasinophytes_1	Dinoflagellates	Dinoflagellates	Cryptophytes	Cryptophytes	Haptophytes_N	Haptophytes_S	Haptophytes_S	Haptophytes_S	Chlorophytes	Chlorophytes	Chlorophytes	Chlorophytes	Chlorophytes	Chlorophytes	Cyanobacteria_1	Cyanobacteria_1	Diatoms	Diatoms
Pigment	neox	prasinox	violax	lutein	chl_b	chl_a	perid	chl_a	allox	chl_a	chl_a	19butfu	fucox	chl_a	neox	violax	lutein	zeax	chl_b	chl_a	zeax	chl_a	fucox	chl_a
Best	0.058085	0.136377	0.0309807	0.00499242	0.420878	0.348686	0.562683	0.437317	0.296249	0.703751	1	0.113617	0.320824	0.565559	0.0543241	0.037612	0.155928	0.00490593	0.166256	0.580974	0.300074	0.699926	0.418409	0.581591
Average	0.0638747	0.129516	0.0226857	0.00370262	0.407478	0.372743	0.539145	0.460855	0.220522	0.779478	1	0.136898	0.303243	0.559859	0.0456391	0.0450419	0.156705	0.00691086	0.147443	0.598259	0.227398	0.772602	0.426069	0.573931
StdDev	0.000140545	0.000127526	7.2543e-05	1.52777e-06	0.000529947	0.00248903	0.0104782	0.0104782	0.0064685	0.0064685	0	0.000836308	0.00358502	0.00140634	9.95177e-05	6.36817e-05	0.000131453	3.15315e-06	0.00138915	0.000618953	0.00406774	0.00406774	0.00525024	0.00525024
Bin :	2	RMS Min :	0.152206	Run # :	1
Class	Prasinophytes_1	Prasinophytes_1	Prasinophytes_1	Prasinophytes_1	Prasinophytes_1	Prasinophytes_1	Dinoflagellates	Dinoflagellates	Cryptophytes	Cryptophytes	Hapto_N	Hapto_N	Hapto_S	Hapto_S	Hapto_S	Hapto_S	Chlorophytes	Chlorophytes	Chlorophytes	Chlorophytes	Chlorophytes	Chlorophytes	Cyanobacteria_1	Cyanobacteria_1	Diatoms	Diatoms
Pigment	neox	prasinox	violax	lutein	chl_b	chl_a	perid	chl_a	allox	chl_a	19hexfu	chl_a	19butfu	fucox	19hexfu	chl_a	neox	violax	lutein	zeax	chl_b	chl_a	zeax	chl_a	fucox	chl_a
Best	0.091505	0.0657343	0.056729	0.0635086	0.178161	0.544362	0.461326	0.538674	0.0999308	0.900069	0.510496	0.489504	0.209054	0.390846	0.0446905	0.35541	0.0318345	0.0800342	0.0732308	0.188471	0.011238	0.615192	0.534054	0.465946	0.56189	0.43811
Average	0.121774	0.0539898	0.0733659	0.0547629	0.154836	0.541271	0.433102	0.566898	0.102294	0.897706	0.554419	0.445581	0.176979	0.403992	0.0794908	0.339538	0.0266586	0.0725903	0.0816141	0.138582	0.00970959	0.670846	0.489622	0.510378	0.505412	0.494588
StdDev	0.000758343	0.000112677	0.000509367	6.4018e-05	0.00167398	0.00311775	0.0137709	0.0137709	6.06862e-06	6.06863e-06	0.00813658	0.00813658	0.0027802	0.00196022	0.00109291	0.000432883	2.97054e-05	4.93723e-05	5.27182e-05	0.00205975	1.00271e-05	0.00261219	0.00161433	0.00161433	0.00408375	0.00408375
Average / standard deviation (over all samples) of taxa compositions.
Bin :	1
Run	Min. RMS Error	Prasinophytes_1	Dinoflagellates	Cryptophytes	Haptophytes_N	Haptophytes_S	Chlorophytes	Cyanobacteria_1	Diatoms		Prasinophytes_1	Dinoflagellates	Cryptophytes	Haptophytes_N	Haptophytes_S	Chlorophytes	Cyanobacteria_1	Diatoms
1	0.0109754	0.16891	0.141145	0.0542829	0.183022	0.1502	0.0966363	0.0817075	0.124095		0.00850126	0.00765628	0.00098926	0.0011656	0.00656152	0.0018306	0.00199173	0.00750161
2	0.0213355	0.200057	0.126575	0.0701673	0.150364	0.133633	0.0933927	0.120281	0.10553		0.0108291	0.00615237	0.00165235	0.00263368	0.00519608	0.00156112	0.00445034	0.00518804
3	0.029553	0.161956	0.180381	0.113961	0.0138189	0.100147	0.0999904	0.130584	0.199162		0.00792933	0.0129692	0.00437674	0.000370875	0.00292184	0.00210912	0.00529453	0.00925811

## Sheet: OutR5
Run # 5 : 21.03.2011 - 13:08:24
*** RATIOS ***
Bin #	FSP Start	FSP End	SSP Start	SSP End	RM	RLM	Final Iteration	Final Step Size	RMS Error
1	1	11	0	0	Testrun1	A	48	1124.55	0.09564
Final Ratio Matrix (F1)
	c3	c12	perid	but	fucox	neox	prasinox	violax	diad	allox	diato	zeax	chl_b	chl_a
Prasino	0	0.0709634	0	0	0	0.0332641	0.0927866	0.0425147	0	0	0	0.0369369	0.351311	0.372224
Dinoflagellates	0	0.142387	0.266006	0	0	0	0	0	0.060308	0	0.0308178	0	0	0.500481
Cryptophytes	0	0.0995242	0	0	0	0	0	0	0	0.107454	0	0	0	0.793021
Chlorophytes	0	0	0	0	0	0.0262784	0	0.0195312	0	0	0	0.0419034	0.20206	0.710227
Cyanobacteria_1	0	0	0	0	0	0	0	0	0	0	0	0.250094	0	0.749906
Diatoms	0	0.0466297	0	0	0.232894	0	0	0	0.142319	0	0.0685432	0	0	0.509615
Chrysopytes	0.0363531	0.077941	0	0.271339	0.18162	0	0	0	0.127236	0	0.0146866	0	0	0.290825
Haptophyceae	0.0233692	0.099578	0	0	0.332464	0	0	0	0.0816953	0	0.0024175	0	0	0.460476
% Change in Ratio Matrix (100 x (F1 - F0) / F0)
Prasino	0	26.6729	0	0	0	26.6729	-3.50915	39.3402	0	0	0	2.20914	37.9201	-25.5832
Dinoflagellates	0	1.94805	1.94805	0	0	0	0	0	1.94806	0	-37.5365	0	0	1.94805
Cryptophytes	0	0	0	0	0	0	0	0	0	0	0	0	0	0
Chlorophytes	0	0	0	0	0	0	0	0	0	0	0	0	0	0
Cyanobacteria_1	0	0	0	0	0	0	0	0	0	0	0	0	0	0
Diatoms	0	-2.05207	0	0	-2.05207	0	0	0	14.4504	0	-2.05206	0	0	-2.05207
Chrysopytes	0	0	0	0	0	0	0	0	0	0	0	0	0	0
Haptophyceae	-2.17184	-2.17184	0	0	-2.17184	0	0	0	33.2527	0	-2.17184	0	0	-2.17184
*** COMPOSTIONS ***
Relative Class Compositions (C1)
Absolute Pigment Compositions - Bin # 1
chl_a
Bin #	Index	Date	Time	Mesocosm	Prasinophyceae	Dinoflagellates	Cryptophyceae	Chlorophyceae	Cyanobacteria	Diatoms	Chrysopyceae	Haptophyceae	Summe Chlorophyll-a
1	1	07.06.2010	0	1	0.0457606	0	0.0252496	0.0188002	0.0299117	0.0283715	0.00642225	0.0280492	0.182565
1	2	08.06.2010	1	1	0.0744551	0.00927805	0.0394876	0	0.0369196	0.090221	0.00724323	0.0565026	0.314107
1	3	09.06.2010	2	1	0.0704952	0.0114825	0.037823	0.0724849	0.0240444	0.0692821	0.00875871	0.0985033	0.392874
1	4	11.06.2010	4	1	0.0827163	0.00649954	0.0592772	0.0842524	0.0112603	0.241838	0.0087959	0.13506	0.6297
1	5	13.06.2010	6	1	0.121522	0.0122772	0.0748382	0	0	0.132164	0.0136745	0.353785	0.70826
1	6	15.06.2010	8	1	0.172204	0.011494	0.0641678	0.105977	0	0.132544	0.0137828	0.429895	0.930065
1	7	17.06.2010	10	1	0.181687	0.00745349	0.0238147	0	0	0.0507135	0.0173656	0.352909	0.633944
1	8	19.06.2010	12	1	0.145488	0.0111337	0.0139042	0	0.00946708	0.0303294	0.0139643	0.141834	0.366121
1	9	20.06.2010	13	1	0.181942	0.0143085	0.0205475	0.073421	0.0323531	0.0753995	0.0134718	0.185697	0.59714
1	10	21.06.2010	14	1	0.22849	0.0146798	0.0187965	0.0476991	0.0364578	0.12507	0.0190888	0.0828482	0.573129
1	11	22.06.2010	15	1	0.232804	0.00125189	0.027318	0.0298206	0.0107802	0.0720214	0.0230709	0.0760532	0.47312
1	12	23.06.2010	16	1	0.317435	0.0130475	0.0188433	0.0240419	0	0.0352132	0.0307915	0.112561	0.551934
1	13	24.06.2010	17	1	0.334202	0.021313	0.0136649	0.154958	0	0.0637613	0.0339814	0.07978	0.70166
1	14	25.06.2010	18	1	0.424567	0.0203456	0.00558482	0.219965	0.0070697	0.100054	0.0482049	0	0.825791
1	15	26.06.2010	19	1	0.552262	0.0333328	0.0585122	0.136473	0	0.0623749	0.0525373	0.0482958	0.943787
1	16	27.06.2010	20	1	0.317887	0.0224842	0.0243856	0.0264044	0.0354869	0.07587	0.0312	0	0.533719
1	17	28.06.2010	21	1	0.221954	0.0410891	0.00966854	0.0675755	0.0826418	0.0976199	0.0209209	0.0164959	0.557966
1	18	29.06.2010	22	1	0.120343	0.0325169	0.0262709	0.0640992	0.0398328	0.0756687	0.0134916	0.0647663	0.436989
1	19	30.06.2010	23	1	0.09144	0.0428254	0.0214237	0.0164612	0.0298824	0.0637061	0.0119176	0.082987	0.360643
1	20	01.07.2010	24	1	0.130696	0.150212	0.0719326	0.12042	0.02424	0.0419107	0.0129834	0.252011	0.804406
1	21	02.07.2010	25	1	0.12506	0.37459	0.0897576	0.264605	0.00736516	0	0.0147801	0.398221	1.27438
1	22	03.07.2010	26	1	0.140606	0.180316	0.104734	0.0791535	0.0229604	0.041193	0.0132636	0.402762	0.984988
1	23	04.07.2010	27	1	0.149882	0.187203	0.125804	0.179776	0.000268657	0.0384779	0.0136971	0.580099	1.27521
1	24	05.07.2010	28	1	0.15798	0.334535	0.152935	0.286478	0	0.11637	0.0133473	0.720147	1.78179
1	25	06.07.2010	29	1	0.126132	0.199966	0.0990347	0.258302	0.00835693	0.0715861	0.0106071	0.584767	1.35875
1	26	07.07.2010	30	1	0.131587	0.215412	0.0911074	0.0243903	0.0346561	0.105471	0.00956835	0.460291	1.07248
1	27	07.06.2010	0	2	0.0457619	0.000357432	0.0155282	0	0.0312939	0.0185266	0.00262335	0.0653837	0.179475
1	28	08.06.2010	1	2	0.0640392	0.00424821	0.0326307	0.0631822	0.00714114	0.0384852	0.00680939	0.0541846	0.270721
1	29	09.06.2010	2	2	0.0739171	0	0.0358582	0.022744	0.011318	0.0608337	0.01005	0.0881865	0.302908
1	30	11.06.2010	4	2	0.0874355	0.0272769	0.051393	0.117727	0	0.236323	0.00612477	0.154591	0.680871
1	31	13.06.2010	6	2	0.100468	0.0153801	0.0651938	0.0579387	0	0.071668	0.00601074	0.322533	0.639192
1	32	15.06.2010	8	2	0.0906466	0.00835967	0.0290688	0	0	0	0.0106701	0.349707	0.488452
1	33	17.06.2010	10	2	0.0950426	0.00966858	0.00726612	0	0	0.00141147	0.0130344	0.282249	0.408672
1	34	19.06.2010	12	2	0.134432	0	0	0.0208926	0.00710806	0.0143023	0.0139288	0.095049	0.285713
1	35	20.06.2010	13	2	0.11967	0	0.0146899	0.084701	0.00496406	0.051513	0.0109858	0.0510314	0.337555
1	36	21.06.2010	14	2	0.199712	0.00932809	0.0336645	0.107232	0.00673005	0.0833896	0.0196095	0.0992857	0.558952
1	37	22.06.2010	15	2	0.181669	0	0	0	0	0.0139932	0.0160817	0.0607018	0.272446
1	38	23.06.2010	16	2	0.363164	0.0188848	0.0181004	0.0945363	0	0.0702485	0.0289456	0.0371597	0.631039
1	39	24.06.2010	17	2	0.197252	0.0138742	0	0.039131	0.00665627	0.0143007	0.0223788	0.0527776	0.346371
1	40	25.06.2010	18	2	0.404552	0.0108264	0.0217894	0.179401	0	0.0660309	0.0361967	0.0288828	0.747679
1	41	26.06.2010	19	2	0.258085	0.0242301	0.00546	0.018443	0	0.00811564	0.0211921	0.0641892	0.399715
1	42	27.06.2010	20	2	0.235679	0.0326723	0.0252349	0.0296832	0.026151	0.0802863	0.0243854	0.0235384	0.47763
1	43	28.06.2010	21	2	0.162444	0.0263484	0.0177926	0	0.0472458	0.0545612	0.0180758	0.0408782	0.367346
1	44	29.06.2010	22	2	0.115393	0.0290764	0.0369165	0.0267501	0.0294185	0.0577	0.0103309	0.0962908	0.401876
1	45	30.06.2010	23	2	0.103934	0.0354577	0.0261296	0.0631038	0.0492	0.109694	0.0100245	0.162945	0.560489
1	46	01.07.2010	24	2	0.102956	0.0525717	0.065986	0.117601	0.0364891	0.0375507	0.00838095	0.359742	0.781278
1	47	02.07.2010	25	2	0.174722	0.154427	0.127343	0.39639	0	0.0270877	0.014362	0.777737	1.67207
1	48	03.07.2010	26	2	0.13443	0.0551538	0.123207	0.271145	0.0294602	0.0924412	0.0132483	0.64152	1.36061
1	49	04.07.2010	27	2	0.190061	0.0732015	0.122416	0.0210122	0.0135252	0.0188757	0.00905021	0.890953	1.33909
1	50	05.07.2010	28	2	0.179683	0.0690299	0.0871342	0.352094	0	0.0610241	0.015446	0.745188	1.5096
1	51	06.07.2010	29	2	0.160848	0.0278875	0.0552116	0.26098	0.0160079	0.0943797	0.0115666	0.577082	1.20396
1	52	07.07.2010	30	2	0.152447	0.065038	0.0641821	0	0.0837452	0.119773	0.0143735	0.416527	0.916086
1	53	07.06.2010	0	3	0.0491385	0.0080583	0.0197282	0	0.0413526	0.0276886	0.00506686	0.0287376	0.179771
1	54	08.06.2010	1	3	0.0525962	0.0045924	0.0406908	0.044124	0.0171763	0.0370486	0.00786095	0.0772544	0.281344
1	55	09.06.2010	2	3	0.0654021	0.0060037	0.0386738	0.0548216	0.00788665	0.0650702	0.00816258	0.110867	0.356888
1	56	11.06.2010	4	3	0.0552743	0.0111034	0.0383018	0.0580957	0.00355687	0.208664	0.00310101	0.211757	0.589855
1	57	13.06.2010	6	3	0.0980477	0.0188023	0.0727009	0.0271194	0	0.180504	0.00433835	0.464281	0.865794
1	58	15.06.2010	8	3	0.112196	0.0182463	0.0475523	0.0249886	0	0.137905	0.011403	0.520349	0.87264
1	59	17.06.2010	10	3	0.0786854	0.0109152	0.013002	0	0	0.0205403	0.00899515	0.391325	0.523463
1	60	19.06.2010	12	3	0.0661511	0.00674445	0	0	0.0103645	0.0120088	0.00853183	0.107935	0.211736
1	61	20.06.2010	13	3	0.0866096	0	0.00412241	0.0249461	0.0130651	0.0266419	0.00974886	0.0806755	0.245809
1	62	21.06.2010	14	3	0.157542	0.0197721	0.02071	0.081688	0.0181781	0.054638	0.0185817	0.0980983	0.469209
1	63	22.06.2010	15	3	0.173454	0.00768587	0.0246574	0.0068038	0	0.0317849	0.0135962	0.0559562	0.313939
1	64	23.06.2010	16	3	0.226405	0.0165614	0.00590773	0.0304877	0	0.0377102	0.0200854	0.0803705	0.417528
1	65	24.06.2010	17	3	0.235283	0.0222717	0.00942434	0.0220453	0	0.0315423	0.0224153	0.0573169	0.400299
1	66	25.06.2010	18	3	0.5251	0.00891368	0.0145686	0.185099	0	0.075941	0.058095	0	0.867718
1	67	26.06.2010	19	3	0.415236	0.0151158	0	0	0	0.0140848	0.0423625	0.0675395	0.554339
1	68	27.06.2010	20	3	0.365731	0.0112128	0	0.0234867	0.0132496	0.045861	0.0352157	0	0.494757
1	69	28.06.2010	21	3	0.362798	0.026943	0	0.00420514	0.0447101	0.0391364	0.0326644	0	0.510457
1	70	29.06.2010	22	3	0.375277	0.021916	0.0205417	0.113979	0.0133544	0.043704	0.0383341	0.0228106	0.649917
1	71	30.06.2010	23	3	0.263276	0.0364543	0.0155343	0	0.035299	0.0704261	0.0229328	0.0774638	0.521386
1	72	01.07.2010	24	3	0.334598	0.0677851	0.0502182	0.231168	0	0.0427468	0.0337578	0.276908	1.03718
1	73	02.07.2010	25	3	0.386711	0.172439	0.0691892	0.298054	0	0	0.03774	0.549455	1.51359
1	74	03.07.2010	26	3	0	0	0	0	0	0	0	0	0
1	75	04.07.2010	27	3	0.352095	0.0799995	0.101898	0.21148	0	0.0231597	0.0296956	0.673713	1.47204
1	76	05.07.2010	28	3	0.34312	0.0959395	0.0573994	0.562417	0	0.105129	0.0462017	0.606068	1.81628
1	77	06.07.2010	29	3	0.273048	0.0228811	0.0327518	0.206155	0.00109148	0.0644264	0.0282373	0.379177	1.00777
1	78	07.07.2010	30	3	0.189482	0.0378201	0.00925182	0	0.0496807	0.037735	0.0151899	0.237377	0.576536
1	79	07.06.2010	0	4	0.0555087	0.01006	0.0345973	0.00998994	0.0414351	0.031398	0.0050457	0.0350635	0.223098
1	80	08.06.2010	1	4	0.0738863	0	0.0186153	0.0268189	0.0374906	0.0285451	0.00497298	0.082306	0.272635
1	81	09.06.2010	2	4	0.101154	0	0.0242776	0.0521796	0.0130758	0.0675412	0.00238989	0.117826	0.378444
1	82	11.06.2010	4	4	0.087273	0.0154393	0.0466232	0.0488453	0	0.16017	0.00905273	0.164176	0.53158
1	83	13.06.2010	6	4	0.165175	0.0168699	0.0317902	0.0663513	0	0.129641	0.00736377	0.336008	0.753199
1	84	15.06.2010	8	4	0.141144	0.0114922	0.0524622	0.0474919	0.0111465	0.139557	0.015185	0.375882	0.794361
1	85	17.06.2010	10	4	0.113535	0.00436473	0.020791	0	0.0111982	0.0546818	0.0107062	0.23364	0.448917
1	86	19.06.2010	12	4	0.0355547	0	0	0	0.00531647	0	0.00475048	0.102968	0.148589
1	87	20.06.2010	13	4	0.0798102	0	0	0	0.0339649	0.0680277	0.00728445	0.0931918	0.282279
1	88	21.06.2010	14	4	0.177974	0.0650282	0.0157507	0.0605871	0.0147817	0.0814845	0.0185125	0.0815266	0.515645
1	89	22.06.2010	15	4	0.208038	0.00461209	0.0081442	0.0272161	0.00490255	0.0674701	0.0155467	0.0757317	0.411661
1	90	23.06.2010	16	4	0.194592	0.0106948	0.00684242	0.016518	0.00720584	0.0637752	0.0177375	0.0804257	0.397791
1	91	24.06.2010	17	4	0.25717	0.011017	0.00515509	0.072858	0.00914253	0.0723199	0.024303	0.0711787	0.523144
1	92	25.06.2010	18	4	0.337818	0.0234563	0.0104642	0.107621	0	0.0274469	0.0317608	0.0119631	0.55053
1	93	26.06.2010	19	4	0.220646	0.0156486	0.0161352	0	0	0.0151888	0.0230795	0.0266236	0.317321
1	94	27.06.2010	20	4	0.246941	0.0586356	0.03064	0	0.0561034	0.0881604	0.0245651	0.0427639	0.54781
1	95	28.06.2010	21	4	0.187719	0.00982366	0.0199958	0	0.0369985	0.073302	0.0143372	0.0237735	0.36595
1	96	29.06.2010	22	4	0.158595	0.0196645	0.0243622	0	0.0420412	0.102433	0.00866469	0.101896	0.457657
1	97	30.06.2010	23	4	0.116952	0.0149263	0.029637	0	0.0272673	0.0890599	0.00785499	0.234324	0.520022
1	98	01.07.2010	24	4	0.112286	0.00935651	0.0695803	0.26109	0.0131069	0.0997534	0.0122883	0.482666	1.06013
1	99	02.07.2010	25	4	0.183117	0.029496	0.13104	0.467602	0	0.117383	0.0100686	0.94793	1.88664
1	100	03.07.2010	26	4	0.16828	0.0323851	0.109942	0.0353205	0.0252506	0.115725	0.00872732	0.737738	1.23337
1	101	04.07.2010	27	4	0.227455	0.0308179	0.173428	0.440402	0	0.156208	0.00913438	1.5204	2.55785
1	102	05.07.2010	28	4	0.22233	0.0763748	0.128834	0.0265495	0.0250177	0.0770687	0.0123416	0.954156	1.52267
1	103	06.07.2010	29	4	0.154746	0.0114945	0.0568251	0.069125	0.0288658	0.104757	0.0115291	0.628218	1.06556
1	104	07.07.2010	30	4	0.138716	0.013504	0.0612269	0	0.0546659	0.0726494	0.0145923	0.398877	0.754232
1	105	07.06.2010	0	5	0.0585875	0	0.0455634	0.00144366	0.0441788	0.0317638	0.00299648	0.0512722	0.235806
1	106	08.06.2010	1	5	0.116417	0.00725057	0.0574205	0.180644	0.0314132	0.0735959	0.0129648	0.17487	0.654576
1	107	09.06.2010	2	5	0.0554803	0.00560294	0.0292404	0.0303252	0.00222911	0.0325326	0.0056052	0.097766	0.258782
1	108	11.06.2010	4	5	0.0760771	0.00412273	0.0358517	0	0	0.0853336	0.00847602	0.180433	0.390294
1	109	13.06.2010	6	5	0.165202	0.0230292	0.0885728	0.0230588	0	0.163211	0.01568	0.389909	0.868663
1	110	15.06.2010	8	5	0.176656	0.00833391	0.061823	0.0940998	0.00578791	0.239725	0.0131167	0.347932	0.947474
1	111	17.06.2010	10	5	0.0912147	0.0146379	0.0226606	0	0.0199437	0.0750844	0.0100719	0.200334	0.433947
1	112	19.06.2010	12	5	0.0539008	0	0.00703438	0	0.0137555	0.0209158	0.00767482	0.0754028	0.178684
1	113	20.06.2010	13	5	0.0891991	0	0.0126011	0.0554049	0.0268535	0.0552533	0.0107926	0.0827352	0.33284
1	114	21.06.2010	14	5	0.154651	0.0281538	0.0179915	0.13799	0.0111477	0.0442312	0.0159094	0.110618	0.520692
1	115	22.06.2010	15	5	0.2593	0.0115167	0.0230238	0.163456	0.00249074	0.0543126	0.0203388	0.0627173	0.597156
1	116	23.06.2010	16	5	0.264625	0.0124197	0.0357636	0.0364752	0.0148375	0.0699506	0.0189762	0.0542313	0.507279
1	117	24.06.2010	17	5	0.36113	0.026105	0.0497397	0.144447	0	0.0522982	0.0375822	0.0768662	0.748168
1	118	25.06.2010	18	5	0.40459	0.0299028	0.0353975	0	0	0	0.0445231	0.126167	0.64058
1	119	26.06.2010	19	5	0.439182	0.0536414	0.033787	0	0	0	0.0478802	0.0740853	0.648576
1	120	27.06.2010	20	5	0.478336	0.071601	0.0453971	0.0271146	0.0238335	0.0746735	0.0479458	0.0374678	0.80637
1	121	28.06.2010	21	5	0.312446	0.0564731	0.0229987	0.0126879	0.0628208	0.106146	0.031041	0.0629506	0.667564
1	122	29.06.2010	22	5	0.279954	0.127655	0.0397032	0.0233698	0.02443	0.0883909	0.0272941	0.0820477	0.692844
1	123	30.06.2010	23	5	0.122603	0.120108	0.0414326	0	0.0201703	0.0544931	0.0172128	0.0947812	0.470801
1	124	01.07.2010	24	5	0.165282	0.161402	0.0669015	0.103017	0	0.0450422	0.0168666	0.165717	0.724228
1	125	02.07.2010	25	5	0.132259	0.251946	0.0842719	0	0	0	0.0109697	0.32589	0.805337
1	126	03.07.2010	26	5	0.108842	0.193989	0.0992145	0.0969765	0.00019316	0.0111352	0.0127992	0.289497	0.812646
1	127	04.07.2010	27	5	0.141682	0.227041	0.100665	0	0	0	0.0147235	0.44754	0.931652
1	128	05.07.2010	28	5	0.129584	0.284626	0.128257	0.170894	0	0	0.0126657	0.497918	1.22394
1	129	06.07.2010	29	5	0.116295	0.203658	0.0838286	0.023704	0.00890153	0	0.0083957	0.336401	0.781184
1	130	07.07.2010	30	5	0.102497	0.134436	0.0676112	0	0.0161931	0	0.00783063	0.419024	0.747592
1	131	07.06.2010	0	6	0.0414904	0.0273871	0.0230791	0.0271966	0.0365419	0.0195969	0.00454325	0.0253287	0.205164
1	132	08.06.2010	1	6	0.0695913	0.0105917	0.0366925	0.0519494	0.0292292	0.0345832	0.00779385	0.0891486	0.32958
1	133	09.06.2010	2	6	0.0630684	0.000160997	0.0360469	0.0160451	0	0.0359895	0.00289008	0.0894927	0.243694
1	134	11.06.2010	4	6	0.0668353	0.011697	0.0671885	0.0956877	0	0.141521	0.00765254	0.215661	0.606244
1	135	13.06.2010	6	6	0.115166	0.00753557	0.10069	0.0140444	0	0.0585568	0.00771332	0.27095	0.574656
1	136	15.06.2010	8	6	0.17217	0.0173736	0.0514378	0.141446	0	0.162217	0.0149446	0.364872	0.924461
1	137	17.06.2010	10	6	0.0954115	0.00581714	0.0161377	0	0.000285508	0.0513078	0.00727832	0.205828	0.382066
1	138	19.06.2010	12	6	0.0610832	0	0.00518859	0	0.0133247	0.0112042	0.00727724	0.10472	0.202798
1	139	20.06.2010	13	6	0.112116	0.00540443	0.0185762	0.0256668	0.0059409	0.062308	0.0115384	0.11504	0.35659
1	140	21.06.2010	14	6	0.163158	0.0199282	0.00988029	0.0235835	0.0108482	0.02576	0.0107912	0.12471	0.38866
1	141	22.06.2010	15	6	0.24096	0.0150977	0.0283241	0.0560765	0.0146766	0.0658505	0.0229349	0.0503558	0.494276
1	142	23.06.2010	16	6	0.221405	0.0284422	0.0146953	0.0241317	0.0129692	0.0535763	0.0180947	0.0767955	0.45011
1	143	24.06.2010	17	6	0.287486	0.0287175	0.0299968	0.0221796	0	0.0313219	0.0261566	0.101449	0.527308
1	144	25.06.2010	18	6	0.42132	0.0411423	0.0210209	0	0	0.00179174	0.0409067	0.11611	0.642292
1	145	26.06.2010	19	6	0.391349	0.0685564	0.00618816	0	0	0	0.0378805	0.06854	0.572514
1	146	27.06.2010	20	6	0.426538	0.0638529	0.0328693	0.0352281	0.0590902	0.0825418	0.0411859	0.0197387	0.761045
1	147	28.06.2010	21	6	0.281211	0.0467319	0.0326752	0	0.0657534	0.0679157	0.0292684	0.00502128	0.528577
1	148	29.06.2010	22	6	0.254979	0.132298	0.0480356	0	0.0263828	0.0569321	0.0192932	0.0586361	0.596557
1	149	30.06.2010	23	6	0.133917	0.149307	0.0290539	0	0.0250052	0.0328309	0.012967	0.0843462	0.467427
1	150	01.07.2010	24	6	0.215556	0.198112	0.0923257	0.117213	0.00031248	0.0249194	0.0204254	0.134161	0.803026
1	151	02.07.2010	25	6	0.17939	0.320144	0.0690786	0	0.00691769	0	0.0166497	0.283415	0.875595
1	152	03.07.2010	26	6	0.152637	0.272372	0.0926841	0.0420904	0.0259527	0	0.0142793	0.200583	0.800597
1	153	04.07.2010	27	6	0.182399	0.248369	0.102352	0	0.00138265	0	0.0189683	0.345101	0.898573
1	154	05.07.2010	28	6	0.208141	0.406285	0.111072	0.134214	0	0	0.0130338	0.508242	1.38099
1	155	06.07.2010	29	6	0.158243	0.21313	0.0638663	0.0030702	0.0111712	0	0.014089	0.297215	0.760785
1	156	07.07.2010	30	6	0.138182	0.295876	0.0734901	0.20429	0.0224224	0.00793606	0.0175227	0.463358	1.22308
1	157	07.06.2010	0	7	0.0668288	0.00823588	0.02951	0.0408229	0.0282651	0.0372031	0.00581792	0.0160765	0.23276
1	158	08.06.2010	1	7	0.0581777	0	0.0259591	0.0755512	0.00437543	0.0339899	0.00452937	0.0788275	0.28141
1	159	09.06.2010	2	7	0.0818199	0.00138194	0.026293	0.060663	0	0.06889	0.00848733	0.134339	0.381874
1	160	11.06.2010	4	7	0.100317	0.00829231	0.0545634	0.0825096	0	0.197024	0.00581047	0.202422	0.650939
1	161	13.06.2010	6	7	0.111157	0.0142685	0.0417163	0.0390464	0	0.0870937	0.0071828	0.250158	0.550623
1	162	15.06.2010	8	7	0.112571	0.011523	0.0300941	0	0.0111552	0.0675463	0.010391	0.251181	0.494462
1	163	17.06.2010	10	7	0.0960107	0.0102711	0.00327031	0	0.00301254	0.0503762	0.00787173	0.166758	0.337571
1	164	19.06.2010	12	7	0.0536538	0.00178849	0	0	0.00396274	0.022622	0.00724524	0.0730151	0.162287
1	165	20.06.2010	13	7	0.119929	0.00674959	0.0253688	0.0124703	0.000630114	0.0484176	0.0118229	0.169048	0.394436
1	166	21.06.2010	14	7	0.116741	0.0379089	0.024109	0	0.0112488	0.0496354	0.0102444	0.132298	0.382186
1	167	22.06.2010	15	7	0.168456	0.00597326	0.023445	0.0625764	0.00643337	0.0918718	0.0178526	0.0668943	0.443502
1	168	23.06.2010	16	7	0.135569	0.00963629	0.0197114	0	0.00485865	0.042167	0.0115196	0.063036	0.286498
1	169	24.06.2010	17	7	0.184001	0.026454	0.02204	0.0395816	0	0.0457863	0.0180034	0.0718757	0.407742
1	170	25.06.2010	18	7	0.160125	0.0165754	0.0104822	0	0	0.0327803	0.0168685	0.0822648	0.319096
1	171	26.06.2010	19	7	0.198749	0.0307093	0.0050635	0	0	0.0310109	0.0197258	0.0477154	0.332974
1	172	27.06.2010	20	7	0.217305	0.0341117	0.0283944	0.046841	0.0255738	0.0501258	0.0200099	0.0233406	0.445702
1	173	28.06.2010	21	7	0.211579	0.0318253	0.0351317	0.0381789	0.0295102	0.0377553	0.0199891	0.0523545	0.456324
1	174	29.06.2010	22	7	0.168455	0.042241	0.0486358	0.0247993	0.0211611	0.0839047	0.0147661	0.0881367	0.4921
1	175	30.06.2010	23	7	0.1062	0.0539039	0.0319673	0	0.0310766	0.0624586	0.0129042	0.114799	0.41331
1	176	01.07.2010	24	7	0.196765	0.0720869	0.123331	0.122533	0.0367205	0.115298	0.0189795	0.298894	0.984609
1	177	02.07.2010	25	7	0.241385	0.269769	0.132851	0.0924751	0.0174804	0	0.0211552	0.709897	1.48501
1	178	03.07.2010	26	7	0.191503	0.0960322	0.110596	0.205947	0.0267291	0.107467	0.0195617	0.401607	1.15944
1	179	04.07.2010	27	7	0.163139	0.0771892	0.0902686	0	0.0174297	0	0.00797565	0.60656	0.962562
1	180	05.07.2010	28	7	0.158619	0.0893635	0.0867896	0.151207	0.0130739	0.0360491	0.0144404	0.476275	1.02582
1	181	06.07.2010	29	7	0.158464	0.038382	0.0851036	0.0335724	0.0696594	0.0912261	0.0173505	0.395021	0.888779
1	182	07.06.2010	0	8	0.0545173	0.0130809	0.0206508	0.0435152	0.0222181	0.0152552	0.0050916	0.0253644	0.199693
1	183	08.06.2010	1	8	0.070106	0.00396168	0.0650297	0.0553823	0.0208364	0.0302525	0.00830899	0.0766558	0.330533
1	184	09.06.2010	2	8	0.100555	0	0.057458	0.0638249	0	0.0826765	0.00418672	0.128262	0.436963
1	185	11.06.2010	4	8	0.0742254	0.0209744	0.047688	0.0781956	0	0.113776	0.00575668	0.208631	0.549248
1	186	13.06.2010	6	8	0.105626	0.0180945	0.0519365	0.0486905	0	0.110113	0.008069	0.303752	0.646282
1	187	15.06.2010	8	8	0.11339	0.0161183	0.0447545	0.0161806	0	0.0830229	0.00955062	0.292052	0.57507
1	188	17.06.2010	10	8	0.0843389	0.00960809	0.0217659	0	0.00896835	0.00736744	0.0084797	0.171398	0.311926
1	189	19.06.2010	12	8	0.117956	0.00684762	0.0167766	0	0.0164057	0.0507456	0.0103809	0.126982	0.346095
1	190	20.06.2010	13	8	0.102852	0.00658815	0.0259391	0.044966	0.0101534	0.0628981	0.0111206	0.100424	0.364941
1	191	21.06.2010	14	8	0.167991	0.0172811	0.0337668	0.0478605	0	0.0439766	0.0161106	0.0725631	0.39955
1	192	22.06.2010	15	8	0.179642	0.0128307	0.0162605	0.0367038	0.0306571	0.0955255	0.0184266	0.00856525	0.398611
1	193	23.06.2010	16	8	0.254968	0.0262403	0.0115118	0.0534365	0.00753655	0.0444788	0.0231084	0.0257782	0.447059
1	194	24.06.2010	17	8	0.216734	0.0162644	0.0160913	0.118423	0.00252177	0.0192023	0.0246963	0.0262101	0.440143
1	195	25.06.2010	18	8	0.310176	0.0259981	0.0112954	0.050332	0	0.0141149	0.0275654	0.0592337	0.498716
1	196	26.06.2010	19	8	0.337257	0.0411303	0.0161669	0.0228205	0	0.0156296	0.0363642	0.0116133	0.480981
1	197	27.06.2010	20	8	0.296448	0.0619952	0.036914	0	0.0465266	0.070092	0.0311013	0.0192098	0.562287
1	198	28.06.2010	21	8	0.230297	0.0617692	0.0495461	0.0308646	0.0745892	0.0826117	0.0186009	0.023589	0.571868
1	199	29.06.2010	22	8	0.180698	0.104802	0.0401554	0	0.0397725	0.0752586	0.0187879	0.0329014	0.492376
1	200	30.06.2010	23	8	0.176085	0.199465	0.0405791	0	0.0648141	0.106089	0.0132871	0.124863	0.725182
1	201	01.07.2010	24	8	0.221589	0.25891	0.0704137	0.19273	0.0249921	0.00468009	0.0209291	0.257343	1.05159
1	202	02.07.2010	25	8	0.215659	0.380891	0.0498341	0	0.00996857	0	0.0191952	0.32462	1.00017
1	203	03.07.2010	26	8	0.220009	0.427588	0.0933351	0.109986	0.0375281	0	0.0213999	0.320502	1.23035
1	204	04.07.2010	27	8	0.244418	0.40212	0.111406	0.0482786	0.0272231	0	0.0266716	0.455983	1.3161
1	205	05.07.2010	28	8	0.229768	0.50119	0.0712041	0.248002	0.0132337	0	0.0224034	0.410882	1.49668
1	206	06.06.2010	29	8	0.160138	0.205307	0.0557576	0.0822709	0.0452277	0.0338872	0.0120345	0.196126	0.790749
1	207	07.07.2010	30	8	0.111788	0.193101	0.0431791	0	0.0345825	0	0.0134316	0.128474	0.524556
1	208	07.06.2010	0	9	0.0488594	0.00462738	0.0183436	0.0383424	0.0387032	0.0356973	0.0072661	0.0196748	0.211514
1	209	08.06.2010	1	9	0.0511909	0.004029	0.0349187	0.0254003	0.0163095	0.0242906	0.00515134	0.0751291	0.236419
1	210	09.06.2010	2	9	0.0633994	0.000740211	0.0220433	0	0.00530328	0.0473621	0.0045963	0.0709822	0.214427
1	211	11.06.2010	4	9	0.0792857	0.00897472	0.0315825	0.0279685	0	0.105557	0.00460614	0.141856	0.399831
1	212	13.06.2010	6	9	0.112781	0.0218507	0.0739153	0.0549863	0	0.153634	0.00959002	0.204703	0.63146
1	213	15.06.2010	8	9	0.158926	0.0195866	0.0795452	0.0271635	0	0.105197	0.016285	0.276777	0.683481
1	214	17.06.2010	10	9	0.182239	0.0143989	0.0696546	0	0	0.0225155	0.0110551	0.221404	0.521267
1	215	19.06.2010	12	9	0.192532	0.0110201	0.0813926	0.0299734	0.0100334	0.0608937	0.0207229	0.157524	0.564092
1	216	20.06.2010	13	9	0.226355	0.0251279	0.0808883	0.079206	0.0144624	0.0812242	0.0209182	0.235039	0.763221
1	217	21.06.2010	14	9	0.220052	0.0181488	0.0887494	0.0833518	0	0.0769041	0.0191926	0.145944	0.652342
1	218	22.06.2010	15	9	0.320621	0.0273656	0.127545	0.0795509	0	0.0960412	0.025707	0.0748306	0.751661
1	219	23.06.2010	16	9	0.406723	0.072611	0.10377	0.0553334	0	0.0885082	0.0280228	0.0774776	0.832446
1	220	24.06.2010	17	9	0.341375	0.0606925	0.0669594	0	0	0.0254059	0.0306622	0.141783	0.666878
1	221	25.06.2010	18	9	0.404359	0.0900337	0.0777008	0	0	0	0.0382849	0.188217	0.798595
1	222	26.06.2010	19	9	0.559929	0.188939	0.105842	0	0	0.00582326	0.0558928	0.131345	1.04777
1	223	27.06.2010	20	9	0.42434	0.199409	0.113497	0	0.00199515	0.0910555	0.0383836	0.0800667	0.948747
1	224	28.06.2010	21	9	0.241508	0.181844	0.133591	0	0.0549169	0.0935102	0.029543	0.0380614	0.772975
1	225	29.06.2010	22	9	0.157699	0.238945	0.137485	0	0.0373144	0.0880442	0.0196372	0.0604872	0.739612
1	226	30.06.2010	23	9	0.0686833	0.188635	0.109177	0	0.0266917	0.064839	0.0070538	0.0419548	0.507035
1	227	01.07.2010	24	9	0.0783705	0.174648	0.154491	0	0.0204136	0.00443954	0.00839423	0.117555	0.558313
1	228	02.07.2010	25	9	0.0934696	0.362347	0.163295	0	0.00270004	0	0.00833077	0.156104	0.786246
1	229	03.07.2010	26	9	0.0585003	0.263423	0.199333	0	0.017749	0	0.00423847	0.158196	0.701439
1	230	04.07.2010	27	9	0.0504617	0.278605	0.181455	0	0.0178895	0	0.0075899	0.20548	0.741481
1	231	05.07.2010	28	9	0.0467124	0.247088	0.12062	0	0.00248595	0	0.00428733	0.200699	0.621892
1	232	06.07.2010	29	9	0.021623	0.208972	0.134919	0	0.0101537	0	0.00326868	0.0836965	0.462632
1	233	07.07.2010	30	9	0.0690261	0.220115	0.201112	0	0.00910699	0.0140276	0.0036046	0.428647	0.94564
1	234	07.06.2010	0	Fjord	0.0714641	0.0121831	0.0732656	0.056944	0.0372763	0.0978013	0.00339946	0.184539	0.536873
1	235	08.06.2010	1	Fjord	0.100778	0.00269231	0.0862137	0.104617	0.0106187	0.138684	0.00986495	0.302257	0.755727
1	236	09.06.2010	2	Fjord	0.14323	0	0.0664826	0.197113	0	0.05675	0.00586754	0.164892	0.634335
1	237	11.06.2010	4	Fjord	0.00967564	0	0	0	0	0.0359115	0.00105226	0.0508972	0.0975366
1	238	13.06.2010	6	Fjord	0.0541237	0.0103885	0.0736909	0	0	0.168628	0.000179722	0.647464	0.954475
1	239	15.06.2010	8	Fjord	0.0390006	0.0254677	0.0364665	0.0304465	0	0.184707	0.0388236	0.490827	0.845739
1	240	17.06.2010	10	Fjord	0.0146176	0.00675906	0.0429922	0	0	0.184643	0.000696835	0.521994	0.771703
1	241	19.06.2010	12	Fjord	0	0.0137991	0.153866	0	0.00776748	0.0305629	0.00212876	0.387866	0.595991
1	242	20.06.2010	13	Fjord	0.0101535	0.00627801	0.0938298	0	0.0324048	0.11503	1.37626e-06	0.216195	0.473893
1	243	21.06.2010	14	Fjord	0.0163517	0.0181053	0.083992	0	0.0205973	0.0715092	0.000881064	0.228951	0.440388
1	244	22.06.2010	15	Fjord	0.0157936	0.0125996	0.248994	0	0.0140286	0.0448861	0.000294124	0.141468	0.478064
1	245	23.06.2010	16	Fjord	0.00152259	0.0142548	0.192517	0	0.0140281	0.0381397	0.000710682	0.0627174	0.32389
1	246	24.06.2010	17	Fjord	0.00213196	0.0145555	0.13743	0	0.00687516	0.0149724	0.000726075	0.227597	0.404289
1	247	25.06.2010	18	Fjord	0.0380115	0.0255425	0.246375	0.0430986	0.00475047	0.157861	0.000323766	0.503579	1.01954
1	248	26.06.2010	19	Fjord	0.0233188	0.0149678	0.228775	0	0.0134382	0.131498	0	0.317813	0.729811
1	249	27.06.2010	20	Fjord	0.0143967	0.030098	0.187381	0	0.0228907	0.209908	0.000564287	0.28341	0.748649
1	250	28.06.2010	21	Fjord	0.0110889	0.0251857	0.0959753	0	0.0176981	0.166391	0.000258259	0.197558	0.514155
1	251	29.06.2010	22	Fjord	0.00191549	0.0187541	0.148498	0	0.027314	0.102241	0.000255587	0.142104	0.441082
1	252	30.06.2010	23	Fjord	0.00895809	0.0155	0.120716	0	0.0199777	0.0997741	0.00548685	0.078734	0.349147
1	253	01.07.2010	24	Fjord	0.0189354	0.00919228	0.0497003	0	0.0124014	0.00181713	0.000283894	0.274298	0.366628
1	254	02.07.2010	25	Fjord	0.0163905	0.0235809	0.0884333	0	0.00493662	0	0.000435414	0.288167	0.421944
1	255	03.07.2010	26	Fjord	0.00265335	0.020511	0.13826	0	0.00893475	0.0837734	0.0021024	0.285582	0.541817
1	256	04.07.2010	27	Fjord	0.050716	0.018386	0.13747	0	0.0138304	0.103492	0.00449022	0.305715	0.634099
1	257	05.07.2010	28	Fjord	0.00168985	0.0345463	0.0776212	0	0.0167793	0.0978326	0.000717841	0.252804	0.481991
1	258	06.07.2010	29	Fjord	0.0118652	0.0219409	0.0927843	0	0.0152228	0.11065	0.000695606	0.367433	0.620591
1	259	07.07.2010	30	Fjord	0.0468648	0.0201225	0.0967967	0	0.028386	0.160571	0	0.415054	0.767795
